# Supplementary material for: Covalent bicyclization of protein complexes yields durable quaternary structures
Source: PubMed Central journal article supplement — Chem. 2024 Feb 8;10(2):615–27. doi: 10.1016/j.chempr.2023.10.003 (PMC10857811; doi:10.1016/j.chempr.2023.10.003), 2024-02-08
Supplement: mmc1.pdf [file mmc1.pdf]

**Chem, Volume 10**

**Supplemental information**

**Covalent bicyclization of protein complexes**

**yields durable quaternary structures**

**George H. Hutchins, Sebastian Kiehstaller, Pascal Poc, Abigail H. Lewis, Jisun Oh, Raya Sadighi, Nicholas M. Pearce, Mohamed Ibrahim, Ivana Drienovská, Anouk M. Rijs, Saskia Neubacher, Sven Hennig, and Tom N. Grossmann**

## Supplementary Experimental Procedures

### Molecular Biology

Wild-type PFE (**p1**) in a previously reported construct [1] with a C-terminal His-tag was used to prepare variants **p2**, **p3** and **p4** containing T3C and Q174C mutations by site-directed mutagenesis, via a modified QuikChange (Agilent) protocol as described previously [2], using *Pfu* Turbo polymerase and 27-mer overlapping primers (obtained from IDT). Residual template DNA in the completed PCR reactions was digested by addition of DpnI (NEB) at 37°C for 1 hour followed by transformation of 1–5  $\mu$ L of the reaction into chemically competent *E. coli* DH5- $\alpha$  cells, mini-prep scale DNA purification and confirmation of successful mutagenesis by Sanger sequencing (Eurofins Genomics).

All other trimeric protein variants (Table S11) were synthesized and cloned by Twist Bioscience in a pET28a (+) expression vector (kanamycin resistant, IPTG inducible). Constructs for the suite of protein trimers were designed to match the exact expressed sequence of proteins deposited to the protein databank, containing either an N-terminal or C-terminal hexa-histidine tag and any additional cleavage sites and tags. Full-length sequences of all expressed proteins are included in Supplementary Figure S1 and Table S11.

### Protein Expression and Purification

Protein expression vectors were transformed into *E. coli* BL21(DE3) cells by addition of 10–50 ng of purified plasmid DNA and heat-shock at 42°C for 45 seconds. Transformed colonies were inoculated in 100 mL of LB (with 100 mg/L ampicillin or 50 mg/L kanamycin dependent on resistance) and incubated overnight at 37°C, 130 RPM. 20 mL of overnight culture was transferred to 1 L volumes of LB (containing respective antibiotics) and cultured to an OD<sub>600nm</sub> of 0.6–0.8 prior to induction by addition of 0.2% (m/v) *L*-rhamnose or 1 mM IPTG and expressed for 16–18 hours at 28°C, 130 RPM. Alternative trimers were expressed as above (50 mg/L kanamycin, 1 mM IPTG) in TB media. Cell pellets were harvested by centrifugation (4000 RPM, 20 minutes) and resuspended in lysis buffer (50 mM Tris, 300 mM NaCl, 20 mM imidazole, pH 8).

Cells were lysed by four passes through a microfluidizer (Microfluidics LM20), and cell debris removed by centrifugation at 18 000 RPM for 30 minutes at 4°C. His-tagged proteins were purified by nickel affinity chromatography, flowing the clarified lysate through a 1 mL HisTrap FF column (Cytiva) equilibrated with lysis buffer at 3 mL/min., followed by further column washing with lysis buffer, and protein elution by increasing imidazole concentration to 250 mM. Protein samples were further purified by size exclusion chromatography with a 16/600 Superdex 75 or 200 pg column (Cytiva), buffered in 50 mM HEPES, 150 mM NaCl, at pH 8. Tris (2-carboxyethyl) phosphine (TCEP) at a concentration of 0.5 mM was added to the size exclusion buffer for purification of crosslinking variants to ensure reduction of exogenous solvent exposed cysteine residues. Successful purification of protein samples was confirmed by SDS-PAGE and LC-MS analysis, and samples were concentrated to 65–150  $\mu$ M (Amicon centrifugal filtration) and flash frozen in liquid nitrogen for storage at –80°C prior to use. Extinction coefficients ( $\epsilon$ ) used to determine protein concentration were predicted using the ExPASy ProtParam tool [3]. All protein concentrations are reported as *trimeric* concentration, regardless of crosslinking status (*e.g.*, PFE monomeric  $\epsilon$  = 36 743 M<sup>-1</sup>cm<sup>-1</sup>, trimeric  $\epsilon$  = 110 229 M<sup>-1</sup>cm<sup>-1</sup>) unless otherwise stated.

### SDS-PAGE

SDS-PAGE samples were prepared by mixing a concentration of 5–20  $\mu$ M protein with standard Coomassie loading dye and incubated at 95°C for 15 minutes, except (as noted in Figure S17) where a final concentration of 6 M urea was added in addition to loading dye, with no heating. Samples were analysed by a 4–20% gradient gel (GenScript) for 1 hour at 150 V and stained by Instant Blue Coomassie (Abcam).

### Protein Liquid Chromatography/Mass Spectrometry

The molecular weight of variants and their crosslinked counterparts was assessed by LC/MS on different systems, indicated for each data collection in the respective supplementary figure. High-resolution MS of PFE variants and their crosslinked counterparts (Table S1) was performed using an UltiMate 3000 RSLCnano system (Thermo Fisher Scientific). The samples were injected on a 1.0 mm I.D. x 30 cm, 4  $\mu$ M

TSKgel superSW3000 SEC column (Tosoh). The mobile phase comprised of 150 mM ammonium acetate (AA). The isocratic gradient applied was as follows: 0–16 min, 100% AA at a flow rate of 16  $\mu$ L/min. The injection volume and column temperature were set at 1  $\mu$ L and 23°C, respectively. This LC set up was coupled to a TIMS-Qq-TOF mass spectrometer (first generation, Bruker equipped with an electrospray-ionization (ESI) source [4]. All measurements were acquired for 16 min operating the mass spectrometer in positive mode with the following ESI and MS settings: capillary voltage of 4.2 kV, nebulizer gas of 0.8 bar, dry gas flow of 4.0 L/min, drying temperature of 200°C, ion energy of 5 eV, collision energy of 10 eV, and in-source collision-induced dissociation at 80 eV. The mass spectrometer was in TIMS-off mode (no ion mobility) using a  $m/z$  range of 500–8000. Ion funnels were set at values of 350 Vpp and 600 Vpp. Data analysis was performed using Bruker Compass DataAnalysis. Samples were calibrated externally using Agilent ESI tuning mix for ESI-ToF.

Analysis of PFE variant charge states (Figure 1C) was measured on an Agilent 6230 ESI-TOF LC/MS (3500 V capillary voltage), whilst molecular weight of all other trimeric variants (Figures S12-S16) was determined using either an Agilent 6230 ESI-TOF or LC/MSD XT ESI-Quadrupole LC/MS (3000 V capillary voltage). Both systems were used with the same two LC mobile phases; A ( $H_2O$ , 0.1% v/v formic acid) and B (80% isopropanol, 10% acetonitrile, 10%  $H_2O$ , 0.1% formic acid v/v), with injection of 0.01-0.1 nmol of protein sample via a 50 x 2.1 mm Agilent AdvanceBio RP mAB reverse-phase C4 column. A 10-minute gradient of 0–95% solvent B was applied with a flow rate of 0.3 mL/min. Mass spectra were recorded in the  $m/z$  500–3000 range at a scan rate of 1.0 Hz. Deconvoluted masses were obtained using the maximum entropy algorithm in Agilent software with a mass range of 10,000–100,000 Da and  $H^+$  as the amplifier. Tables for all LC/MS measurements with the calculated ( $m/z = [MW+Z]/Z$ ) and found values for all predominant peaks are included in the Supplementary Information.

The calculated molecular weight of each protein trimer was derived from the ExPASy ProtParam molecular weight [3], excluding the N-terminal methionine residue which is typically cleaved from expressed protein sequence [5]. An additional mass of approximately +178 Da was frequently observed for both unreacted and crosslinked proteins, corresponding to a previously reported N-linked gluconylation [6]. Crosslinked trimer molecular weights were calculated by addition of the mass of reacted Ta-I<sub>3</sub> (381.4 g/mol), minus the mass of three hydrogens per crosslinker (displaced from the reacted cysteine thiol groups).

### **PFE Activity Assays**

Enzymatic activity was assessed by measuring turnover of *p*-nitrophenyl acetate (*p*NPA) to *p*-nitrophenolate (*p*NP). Guanidine hydrochloride dependent activity was determined by incubating PFE variants at a concentration of 50 nM with GuHCl (0, 0.5, 1, 1.5 and 2 M) for 10 minutes prior to the assay. The substrate stock (*p*NPA) was prepared daily in buffer (50 mM HEPES, 50 mM NaCl, pH 7.5) with 10% DMSO v/v at a concentration of 2 mM. Activity was measured at 20°C at a final trimeric concentration of 2 nM PFE in a 100  $\mu$ L volume (5% DMSO v/v), in a half-area 96 well microplate, initiating the reaction by addition of a final substrate concentration of 1 mM *p*NPA. Absorbance at 410 nm was measured in a plate reader (TECAN Spark 20M) for up to 30 minutes at an interval of 20 seconds, with shaking at 270 RPM between measurements. An additional measurement without enzyme was taken to determine background hydrolysis of the substrate at a given concentration of GuHCl and subtracted from the data. All assays were carried out in 50 mM HEPES, 50 mM NaCl, at pH 7.5. Long term high temperature storage experiments (Figure S9) were performed using a final trimer assay concentration of 0.67 nM, after incubating the protein at 50°C at a concentration of 30  $\mu$ M in 50 mM HEPES, 50 mM NaCl, pH 8.

## Supplementary Figures

### p1 (PFE wild type)

```
MSTFVAKDGTQIYFKDWGSGKPVLFSHGWLLDADMWEYQMEYLSSSRGYRTIAFDRRGFGRSDQPWTGNDYDTFA  
DDIAQLIEHLDLKEVTLVGFSSMGGGDVARYIARHGSSARVAGLVLLGAVTPLFGQKPDYPQGVPLDVFARFKTEL  
LKDRAQFISDFNAPFYGINKGQVVSQGVQTQTLQIALLASLKATVDCVTAFAETDFRPDMAKIDVPTLVIHGDG  
DQIVPFETTGKVAELIKGAELKVYKDAPHGFAVTHAQQLNEDLLAFLKRGSHHHHHH
```

### p2 (PFE T3C)

```
MSCFVAKDGTQIYFKDWGSGKPVLFSHGWLLDADMWEYQMEYLSSSRGYRTIAFDRRGFGRSDQPWTGNDYDTFA  
DDIAQLIEHLDLKEVTLVGFSSMGGGDVARYIARHGSSARVAGLVLLGAVTPLFGQKPDYPQGVPLDVFARFKTEL  
LKDRAQFISDFNAPFYGINKGQVVSQGVQTQTLQIALLASLKATVDCVTAFAETDFRPDMAKIDVPTLVIHGDG  
DQIVPFETTGKVAELIKGAELKVYKDAPHGFAVTHAQQLNEDLLAFLKRGSHHHHHH
```

### p3 (PFE Q174C)

```
MSTFVAKDGTQIYFKDWGSGKPVLFSHGWLLDADMWEYQMEYLSSSRGYRTIAFDRRGFGRSDQPWTGNDYDTFA  
DDIAQLIEHLDLKEVTLVGFSSMGGGDVARYIARHGSSARVAGLVLLGAVTPLFGQKPDYPQGVPLDVFARFKTEL  
LKDRAQFISDFNAPFYGINKGQVVSCGVQTQTLQIALLASLKATVDCVTAFAETDFRPDMAKIDVPTLVIHGDG  
DQIVPFETTGKVAELIKGAELKVYKDAPHGFAVTHAQQLNEDLLAFLKRGSHHHHHH
```

### p4 (PFE T3C+Q174C)

```
MSCFVAKDGTQIYFKDWGSGKPVLFSHGWLLDADMWEYQMEYLSSSRGYRTIAFDRRGFGRSDQPWTGNDYDTFA  
DDIAQLIEHLDLKEVTLVGFSSMGGGDVARYIARHGSSARVAGLVLLGAVTPLFGQKPDYPQGVPLDVFARFKTEL  
LKDRAQFISDFNAPFYGINKGQVVSCGVQTQTLQIALLASLKATVDCVTAFAETDFRPDMAKIDVPTLVIHGDG  
DQIVPFETTGKVAELIKGAELKVYKDAPHGFAVTHAQQLNEDLLAFLKRGSHHHHHH
```

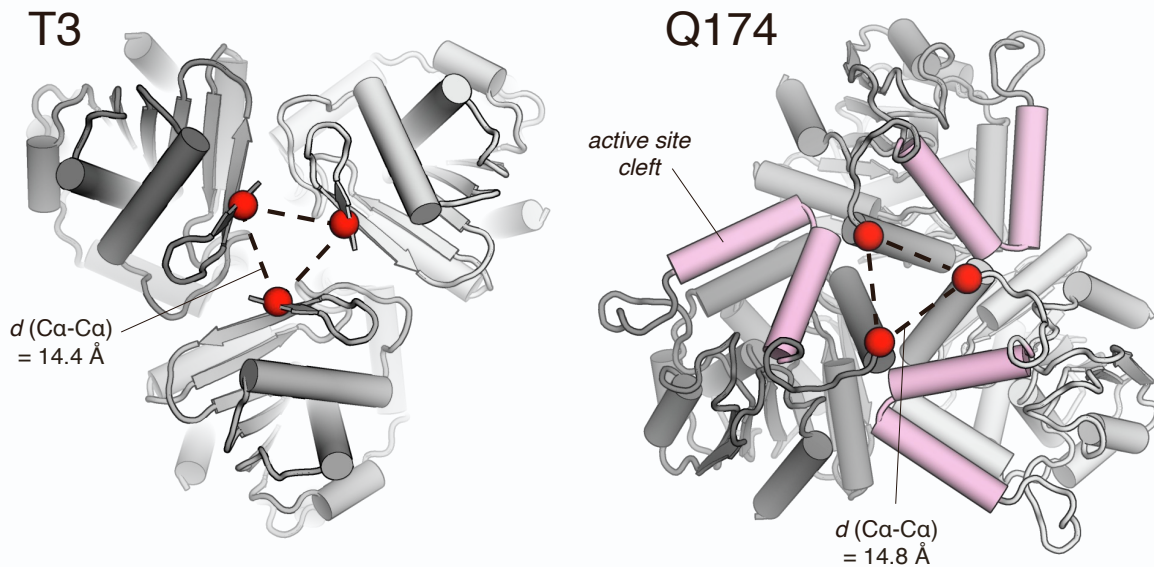

**Figure S1. Design schema for PFE trimeric crosslinking (relating to Figure 1A).** Top: Expressed sequences of PFE wild type (**p1**) and the three variants designed for trimer crosslinking (**p2**, **p3**, **p4**). Bottom: Dashed lines indicate the distance ( $d$ ) between the  $\text{Ca}$  atoms (red) of selected crosslinking sites. Substrate entry to the enzyme active site is via a V-shaped helical hairpin (pink, PDB ID: 1va4).

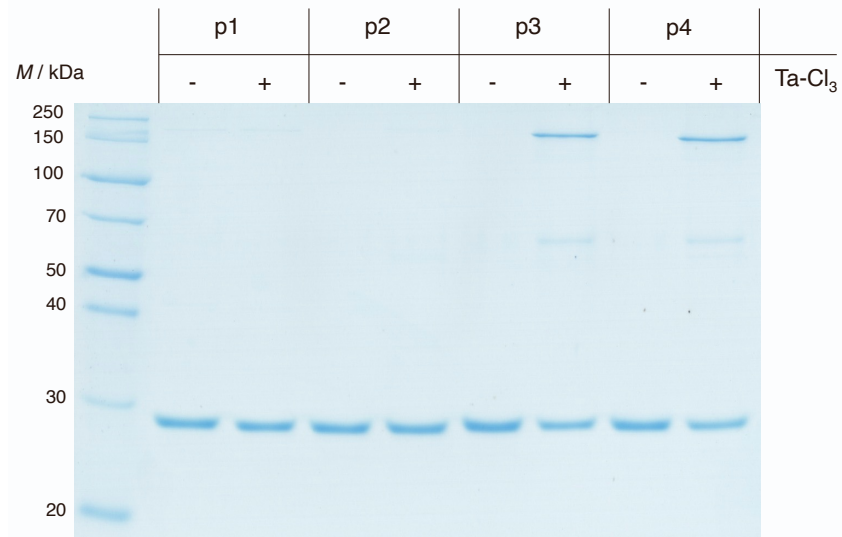

**Figure S2. Reactivity of PFE variants with Ta-Cl<sub>3</sub> (chemical structure in Figure 1B).** Reaction time was 4 hours at 21°C, 15 μM protein trimer, 300 μM Ta-Cl<sub>3</sub>. No reactivity is observed with **p2** (T3C) whilst limited reactivity is observed with **p3** (Q174C) and **p4** (T3C + Q174C) resulting in partial formation of covalently linked trimers (top band) and a small proportion of dimer (middle band).

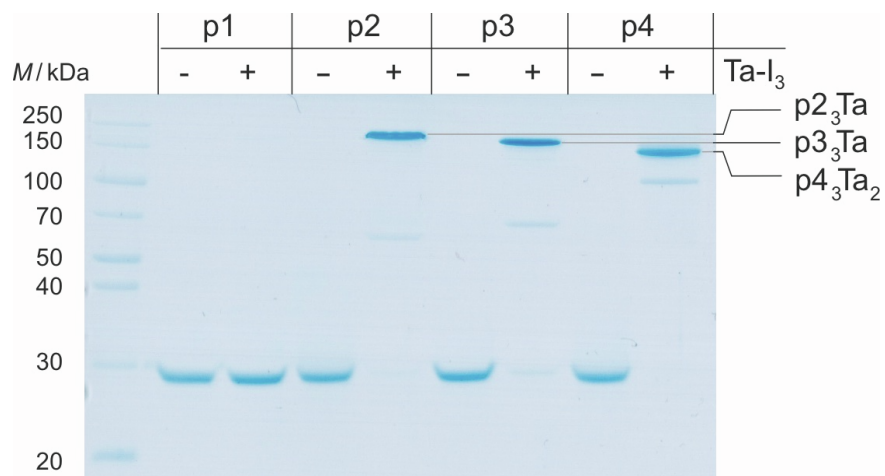

**Figure S3. Reactivity of PFE variants with Ta-I<sub>3</sub> (chemical structure in Figure 1B).** SDS-PAGE analysis of PFE variants prior and after incubation with Ta-I<sub>3</sub> demonstrates the formation of covalently linked, higher molecular weight species, and hinted at the modified chain topology with variable band migration (**p4<sub>3</sub>Ta<sub>2</sub>** > **p3<sub>3</sub>Ta** > **p2<sub>3</sub>Ta**) despite equivalent molecular weight.

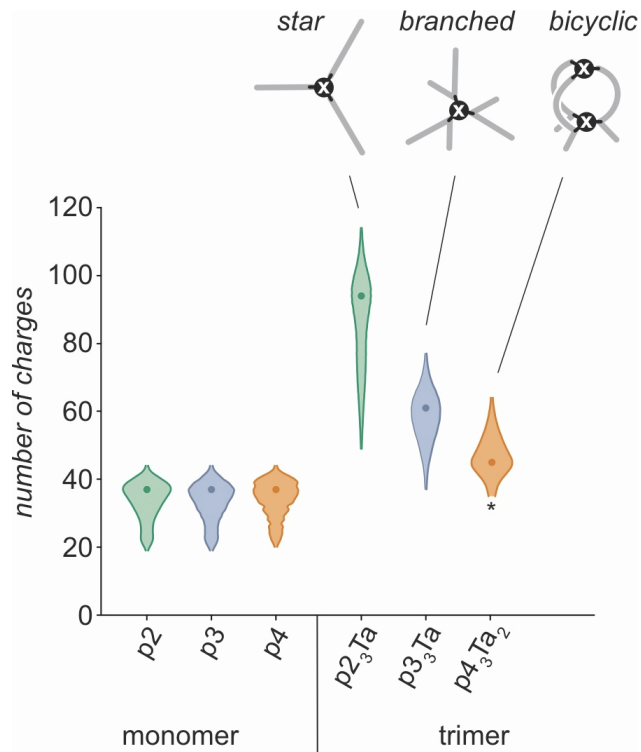

**Figure S4. Violin plot showing distribution and range of charge states for PFE variants p<sub>2</sub>–p<sub>4</sub> and crosslinked variants p<sub>2</sub>–p<sub>4</sub> as observed by TOF-LC/MS, relating to Figure 1C. For MS signals and intensities see Tables S2–S5. \*Due to the *m/z* range of the instrument lower charge states could not be detected. Raw data for p<sub>2</sub><sub>3</sub>Ta, p<sub>3</sub><sub>3</sub>Ta and p<sub>4</sub><sub>3</sub>Ta<sub>2</sub> are presented in Figure 1C.**

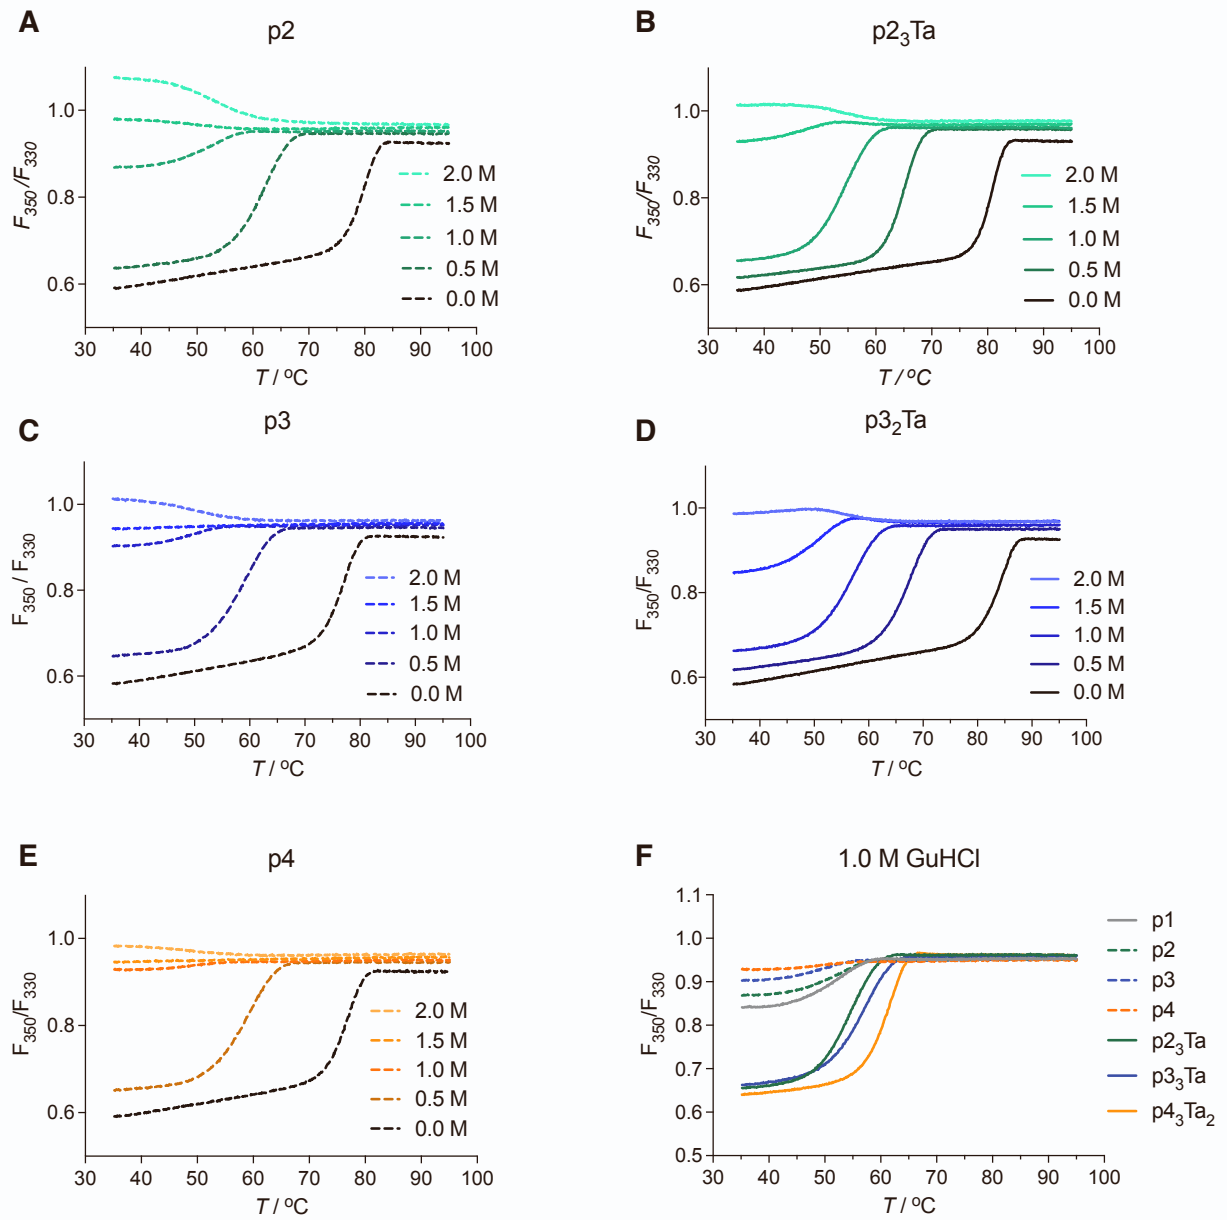

**Figure S5. Thermal melt curves for PFE variants and their crosslinked counterparts.** (A–E) Additional thermal denaturation curves (DSF measurements of tryptophan fluorescence ratio) for PFE variants **p2–p4** before and after crosslinking by Ta-I<sub>3</sub>. Midpoint inflection temperatures ( $T_i$ ) are reported in Figure 2A and Table S6. (F) Comparison of thermal denaturation curves for all variants at 1 M GuHCl further demonstrates the resistance of crosslinked PFE to chemical stress, an effect which is most pronounced for bicyclic **p4<sub>3</sub>Ta<sub>2</sub>**.



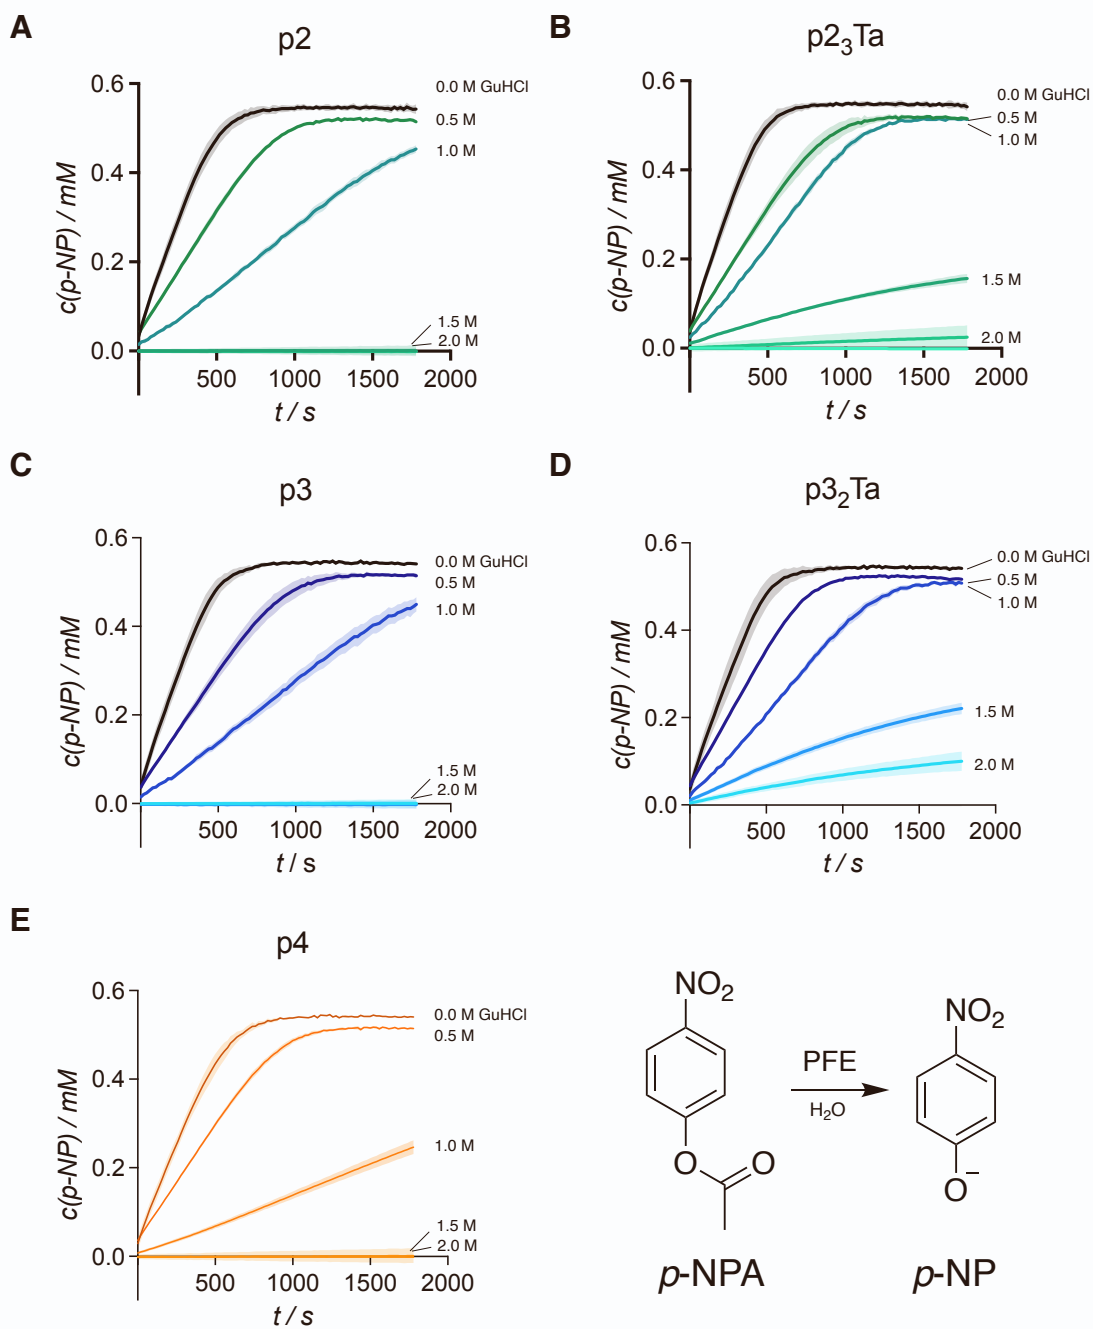

**Figure S6. Enzymatic activity for PFE variants and their crosslinked counterparts.** Activity assayed by hydrolysis of *para*-nitrophenyl acetate (*p*-NPA) to *para*-nitrophenolate (*p*-NP). Additional assay data shown for PFE variants **p2–p4** before and after crosslinking. The initial reaction rate relative to that of **p4<sub>3</sub>Ta<sub>2</sub>** for each concentration of GuHCl was used to compare variants reported in Figure 2D (for absolute values with errors see Table S7). Triplicate technical repeats, standard error shaded.

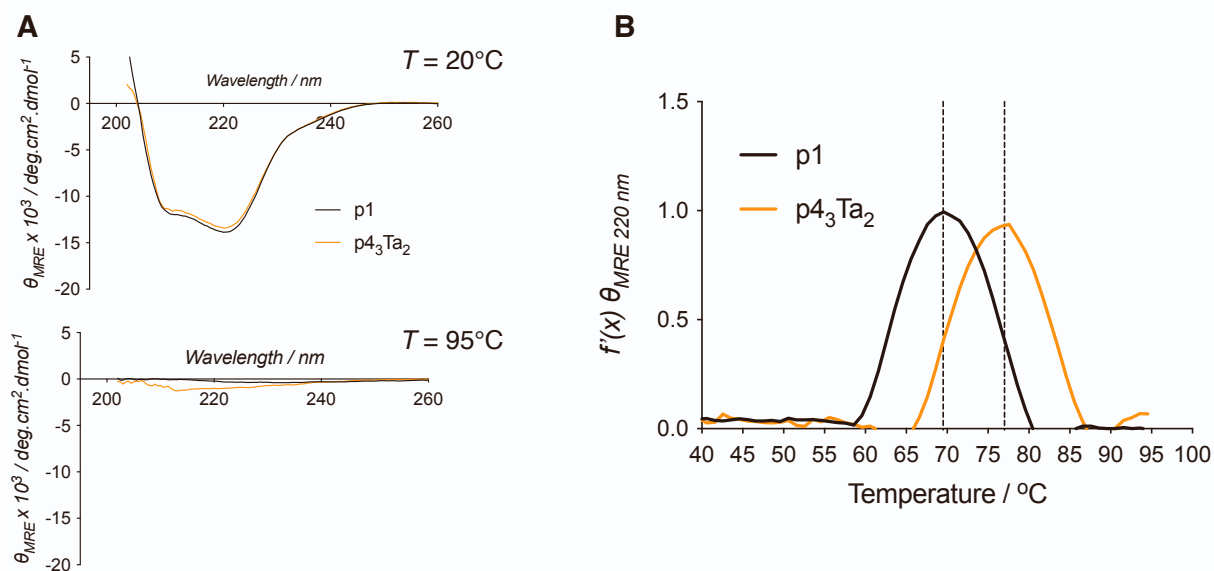

**Figure S7. Circular dichroism spectroscopy of PFE variants (relates to Figures 3A and 3B).** (A) Circular dichroism spectra of PFE variants **p1** and **p4<sub>3</sub>Ta<sub>2</sub>** at 20°C (also shown in Figure 3A) and 95°C at a 4  $\mu\text{M}$  trimer concentration (in 50 mM potassium chloride, 50 mM potassium phosphate, pH 8). At 20°C, we obtained equivalent CD spectra for both **p1** and **p4<sub>3</sub>Ta<sub>2</sub>**, showing characteristic two minima around 210 and 220 nm corresponding to the predominantly helical fold of the trimer. The absence of signal at 95°C suggests complete precipitation of the protein. (B) First derivative of melt curves,  $T_m$  values (Figure 3B) were determined at the curve maximum.

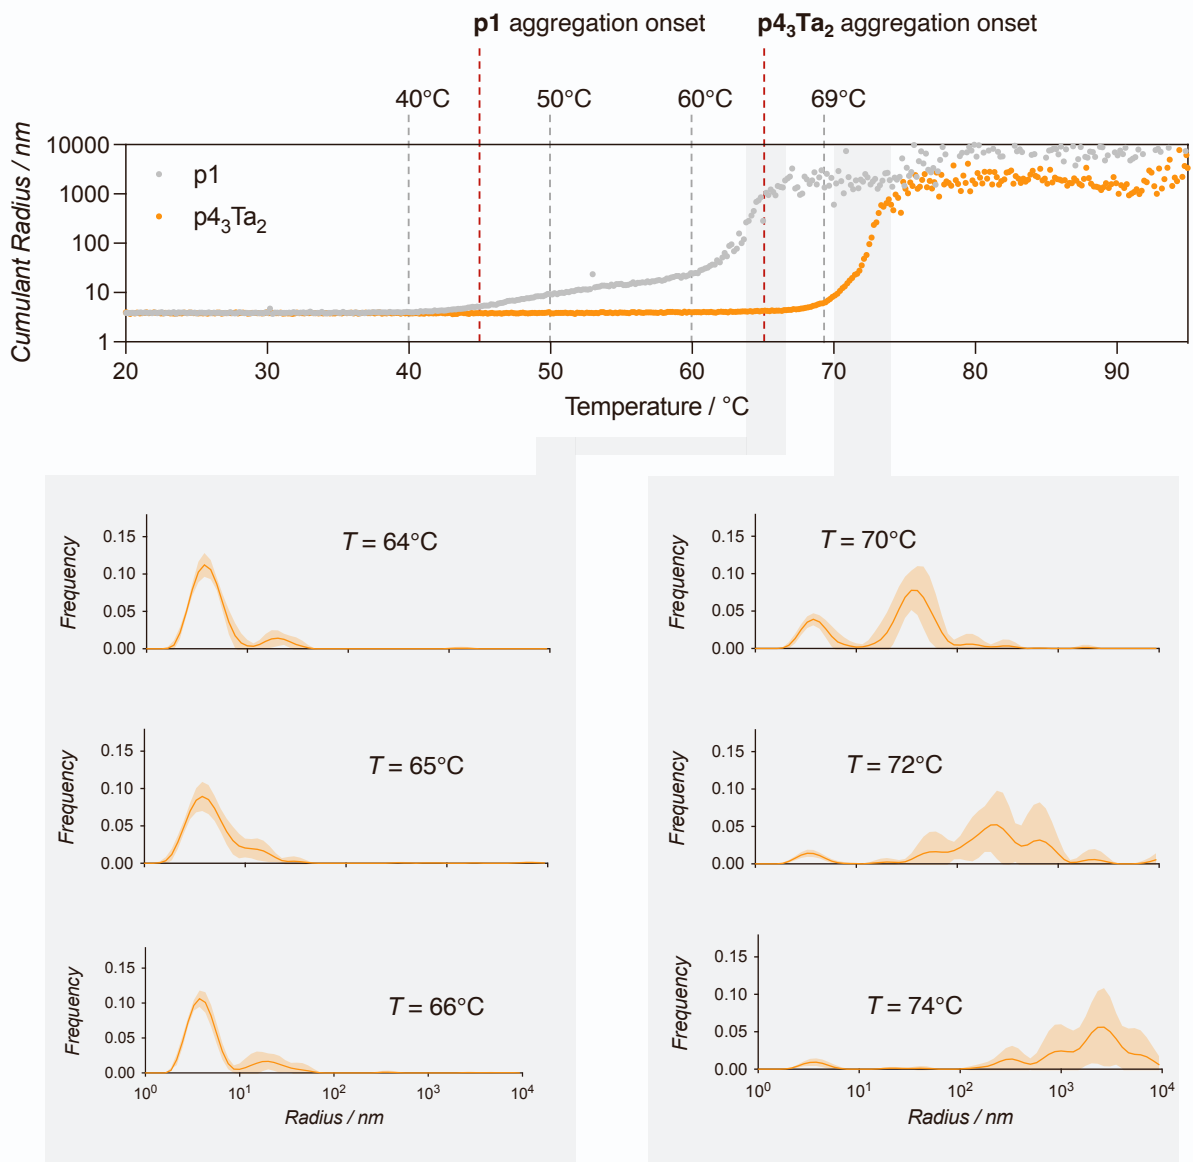

**Figure S8. Crosslinked PFE DLS analysis shows aggregation resistance (relates to Figure 3C).** Cumulant radius values determined by dynamic light scattering for **p1** (grey) and **p4<sub>3</sub>Ta<sub>2</sub>** (orange) demonstrate the predominant particle size of each protein between 20–95°C. Higher order **p1** oligomers begin to form above 45°C, whereas **p4<sub>3</sub>Ta<sub>2</sub>** remains monodisperse until 65°C (size distribution analysis for **p4<sub>3</sub>Ta** at this temperature reveals some polydispersity that is not apparent from the cumulant radius value, which identifies only the dominant species). Temperatures for the initial onset of aggregation are indicated (dashed, red), as are the size distribution slices presented in Figure 3C (dashed, grey) with standard deviation shaded. Additional size distribution slices are shown for **p4<sub>3</sub>Ta<sub>2</sub>** at 64°C, 65°C, 66°C (showing initial aggregation onset) and at 70°C, 72°C, 74°C (showing complete aggregation). Each curve represents an average of six measurements within  $T \pm 0.95^\circ\text{C}$  of the given temperature.

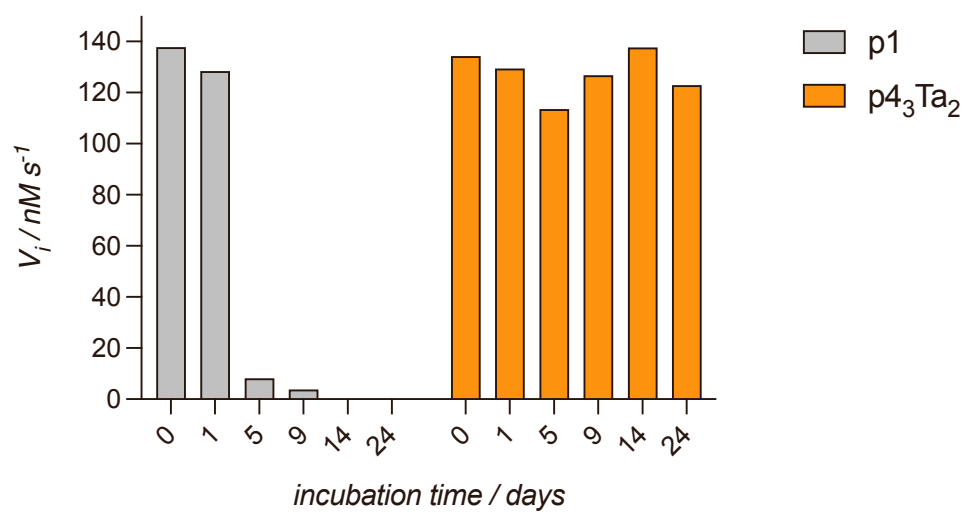

**Figure S9. Long term temperature resistance of p4<sub>3</sub>Ta<sub>2</sub>.** Hydrolysis activity of PFE variants **p1** and bicyclic **p4<sub>3</sub>Ta<sub>2</sub>** shows retained of activity of the crosslinked protein after more than three weeks of incubation at 50°C in 50 mM HEPES, 50 mM NaCl, pH 8.

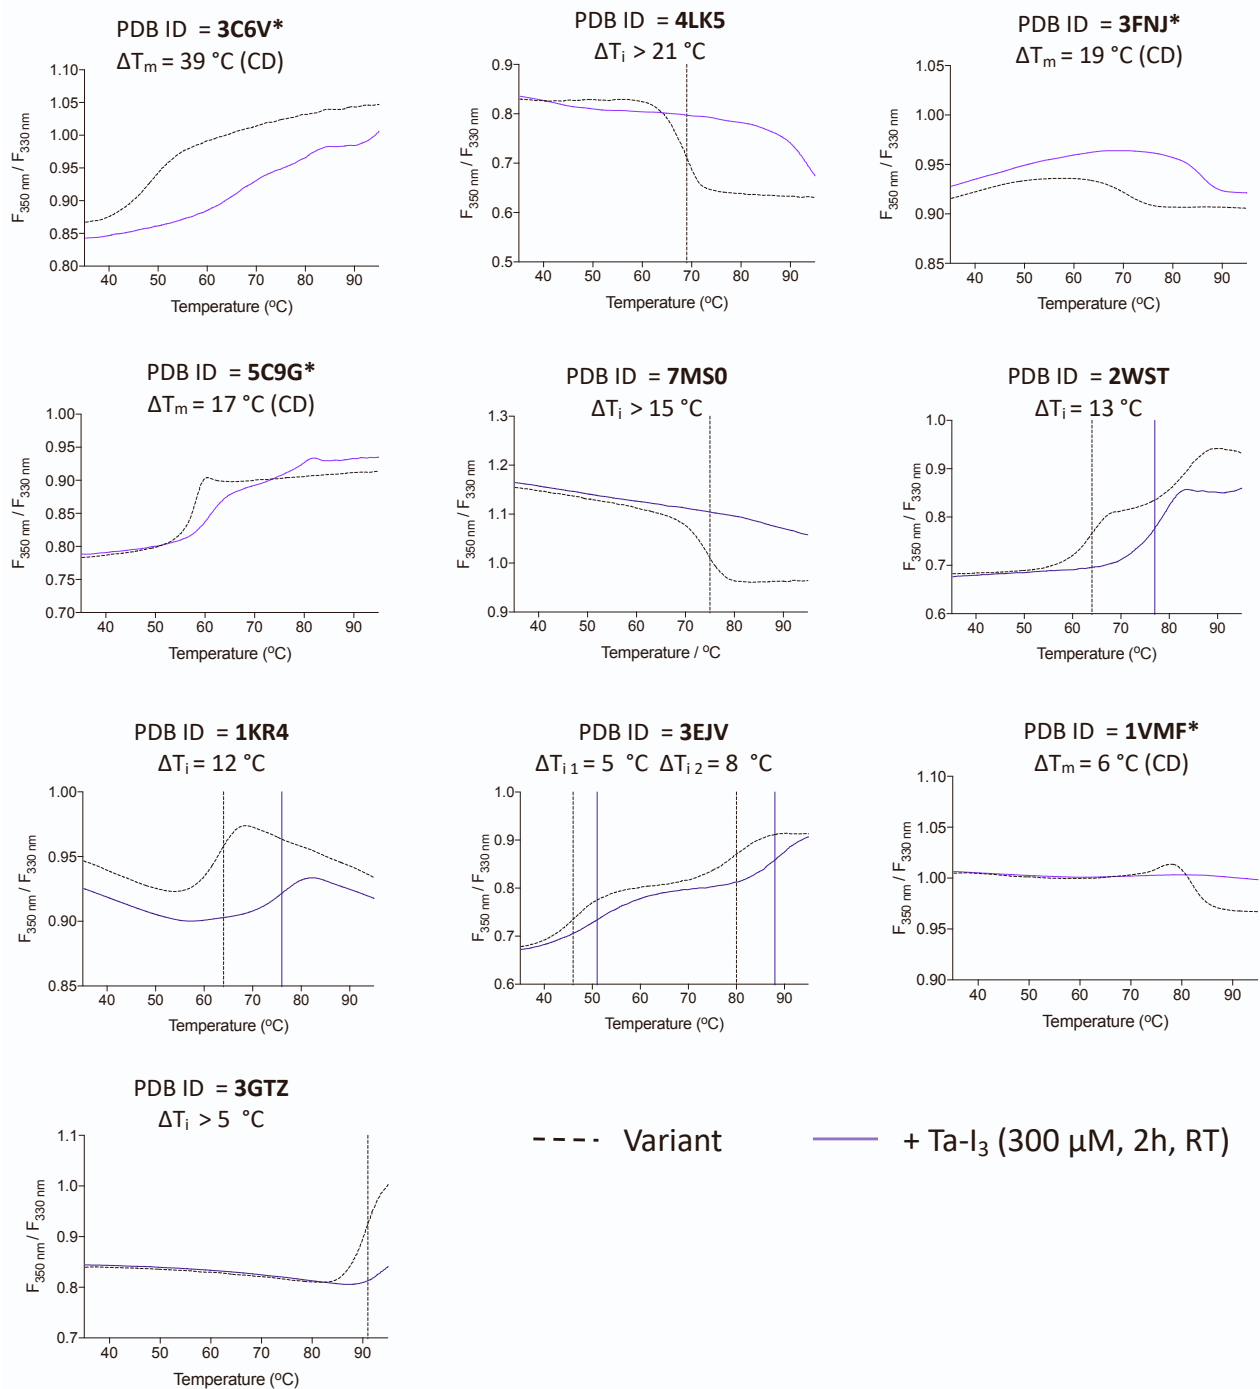

**Figure S10. Widespread trimer stabilization by triselectrophile addition.** DSF thermal denaturation measurements for the ten trimeric designs which demonstrated a stabilizing effect after addition of the crosslinker Ta-I<sub>3</sub> ( $\Delta T_i > 5^\circ\text{C}$ ). The bicyclized products of proteins derived from PDB IDs 3C6V, 5C9G, 3FNJ and 1VMF were further characterized and are presented in Figure 5. For these four examples, the  $T_m$  values indicated here were derived from circular dichroism (CD) measurements (Figure 5), whilst the  $T_i$  values for all other designs were determined by DSF.

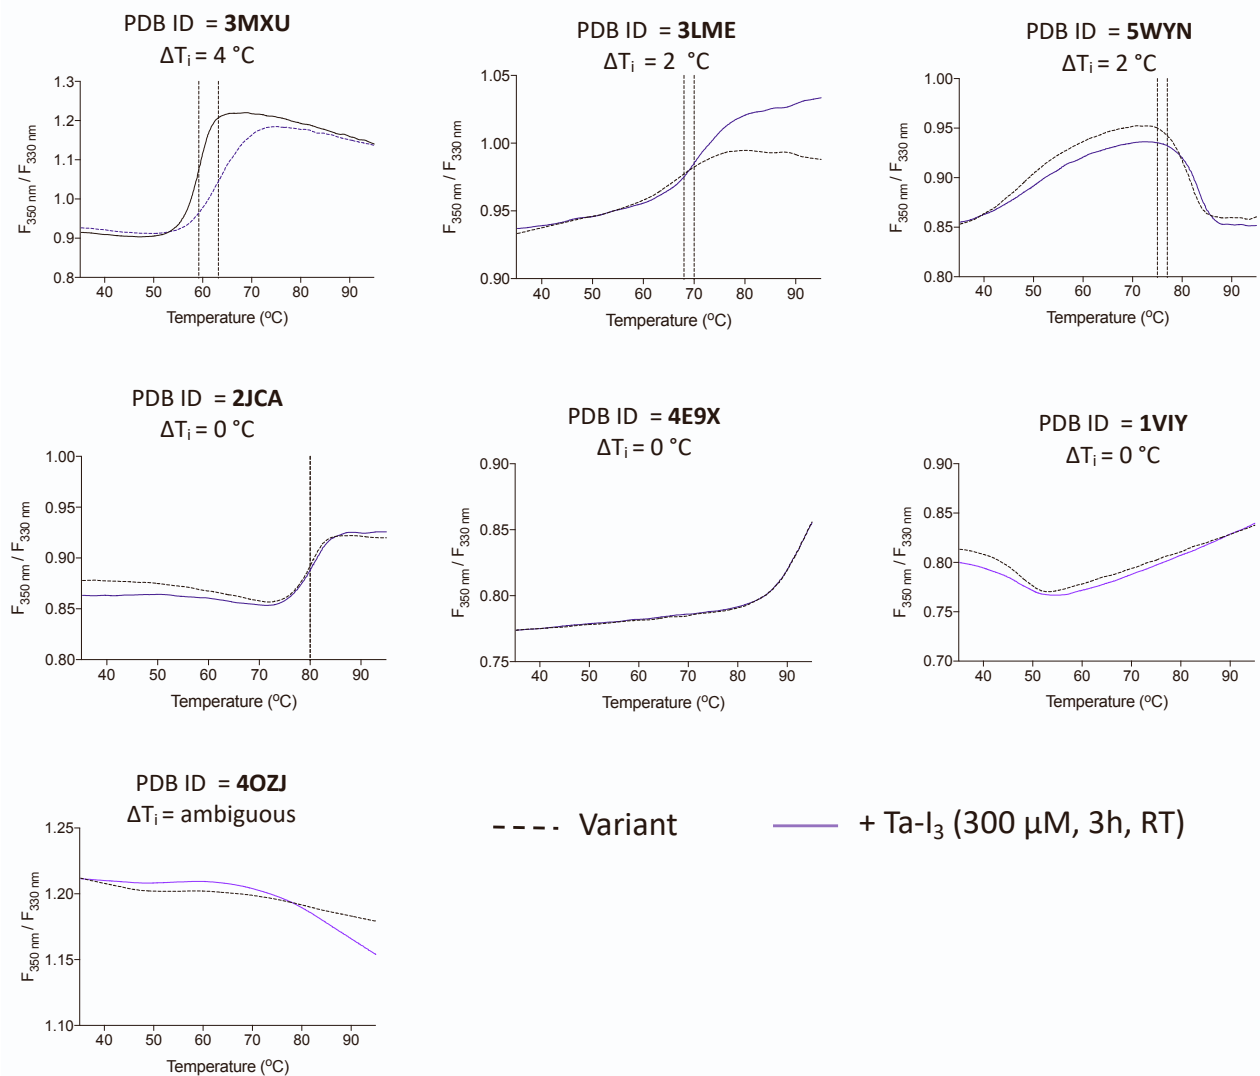

**Figure S11. Unsuccessful stabilization of trimer variants.** DSF thermal melt measurements of the seven tested designs for trimer crosslinking which failed to show a stabilization effect upon addition of the tris-electrophilic crosslinker Ta-I<sub>3</sub> ( $\Delta T_i < 5^\circ\text{C}$ ).

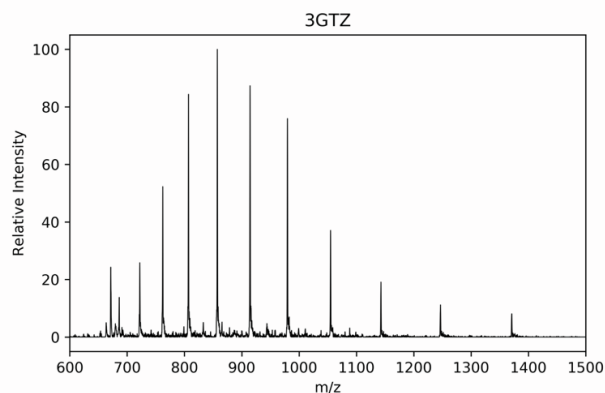

**3GTZ (N20C & Q96C)**  
*MW* calc. = 13 700.5 Da  
 found = 13 701.5 Da

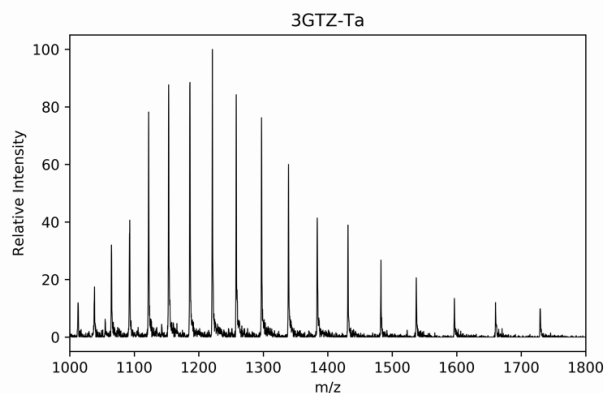

single-crosslinked: **3GTZ<sub>3</sub>Ta<sub>1</sub>**  
*MW* calc. = 41 479.9 Da Da  
 found. = 41 482.7 Da

| Charge | m/z found<br>[M+H] <sup>+</sup> | m/z calc. |
|--------|---------------------------------|-----------|
| 20     | 686.3                           | 686.0     |
| 19     | 722.1                           | 722.1     |
| 18     | 762.2                           | 762.1     |
| 17     | 807.1                           | 806.9     |
| 16     | 857.3                           | 857.3     |
| 15     | 914.5                           | 914.4     |
| 14     | 979.7                           | 979.6     |
| 13     | 1054.9                          | 1054.9    |
| 12     | 1142.8                          | 1142.7    |
| 11     | 1246.7                          | 1246.5    |
| 10     | 1371.0                          | 1371.1    |

Un-reacted 3GTZ peak list

| Charge | m/z found<br>[M+H] <sup>+</sup> | m/z calc. |
|--------|---------------------------------|-----------|
| 39     | 1064.6                          | 1064.6    |
| 38     | 1092.6                          | 1092.6    |
| 37     | 1122.3                          | 1122.1    |
| 36     | 1153.3                          | 1153.2    |
| 35     | 1186.1                          | 1186.1    |
| 34     | 1221.1                          | 1221.0    |
| 33     | 1258.1                          | 1258.0    |
| 32     | 1297.3                          | 1297.2    |
| 31     | 1339.2                          | 1339.1    |
| 30     | 1383.7                          | 1383.7    |
| 29     | 1431.4                          | 1431.3    |
| 28     | 1482.5                          | 1482.4    |
| 27     | 1537.3                          | 1537.3    |
| 26     | 1596.4                          | 1596.4    |
| 25     | 1660.2                          | 1660.2    |

3GTZ<sub>3</sub>Ta<sub>1</sub> peak list

**Figure S12. Mass spectra of 3GTZ (N20C & Q96C) before (left) and after (right) addition of the crosslinker Ta-I<sub>3</sub>, and peak lists for the un-reacted protein and single-crosslinked covalent trimer formed (3GTZ<sub>3</sub>Ta<sub>1</sub>).** The molecular weight of the crosslinked version corresponds to the mass of three monomers of the un-reacted protein variant (13,700.5 Da) plus only one molecule of reacted Ta-I<sub>3</sub> (381.37 Da), minus the hydrogen atoms of the three cysteine thiols. The failure of the second crosslinking site suggests possible solvent inaccessibility of the introduced cysteine side chains. Despite the failure to bicyclize, thermal stabilization ( $\Delta T_i > 5^\circ\text{C}$ , Figure S10) is observed for the mono-crosslinked trimer. Data collected on Agilent LC/MSD XT ESI-Quadrupole LC/MS.

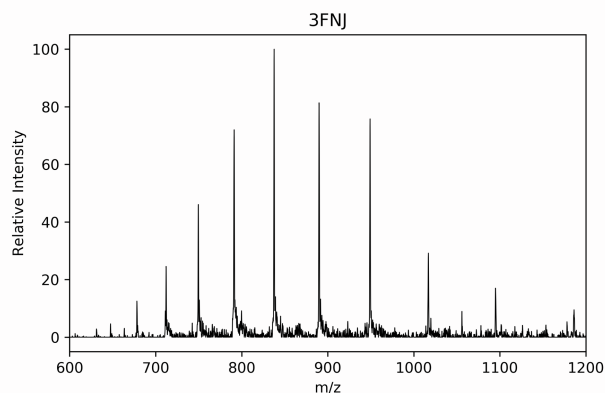

**I4** (3FNJ, E7C & E108C)  
*MW* calc. = 14 221.4 Da  
 found = 14 222.8 Da

| Charge | m/z found<br>[M+H] <sup>+</sup> | m/z calc. |
|--------|---------------------------------|-----------|
| 21     | 678.2                           | 678.3     |
| 20     | 712.1                           | 712.2     |
| 19     | 749.6                           | 749.6     |
| 18     | 791.2                           | 791.2     |
| 17     | 837.7                           | 837.6     |
| 16     | 889.9                           | 889.9     |
| 15     | 949.2                           | 949.2     |
| 14     | 1016.9                          | 1016.9    |
| 13     | 1094.9                          | 1095.1    |
| 12     | 1186.2                          | 1186.3    |

Un-reacted I4 peak list

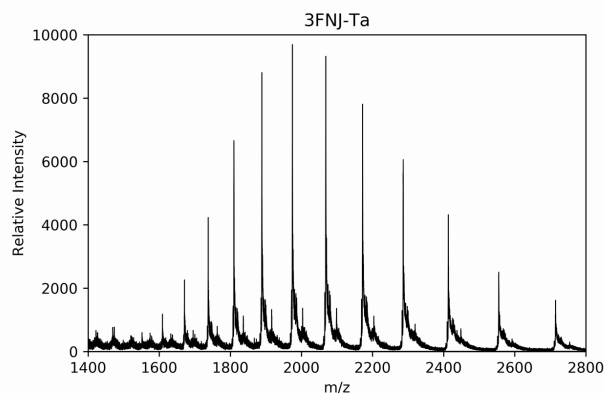

bicyclic **I4<sub>3</sub>Ta<sub>2</sub>**  
*MW* calc. = 43 420.9 Da  
 found. = 43 421.1 Da

| Charge | m/z found<br>[M+H] <sup>+</sup> | m/z calc. |
|--------|---------------------------------|-----------|
| 27     | 1609.19                         | 1609.18   |
| 26     | 1671.11                         | 1671.03   |
| 25     | 1737.85                         | 1737.84   |
| 24     | 1810.22                         | 1810.2    |
| 23     | 1888.88                         | 1888.87   |
| 22     | 1974.7                          | 1974.68   |
| 21     | 2068.68                         | 2068.66   |
| 20     | 2171.94                         | 2172.05   |
| 19     | 2286.32                         | 2286.31   |
| 18     | 2413.33                         | 2413.27   |
| 17     | 2555.25                         | 2555.17   |
| 16     | 2714.85                         | 2714.81   |

I4<sub>3</sub>Ta<sub>2</sub> peak list (43 421.1 Da species)

**Figure S13. Mass spectra and peak lists for I4 (PDB ID: 3FNJ, E7C & E108C) before (left) and after (right) crosslinking with two Ta-I<sub>3</sub> molecules, producing bicyclic I4<sub>3</sub>Ta<sub>2</sub> (Figure 5A). The found mass of I4<sub>3</sub>Ta<sub>2</sub> corresponds to the molecular weight of three copies of the un-reacted protein variant (14 221.4 Da) plus two molecules of reacted Ta (381.37 Da), minus six hydrogens. Data collected on Agilent LC/MSD XT ESI-Quadrupole LC/MS (I4) and Agilent 6230 ESI-TOF LC/MS (I4<sub>3</sub>Ta<sub>2</sub>).**



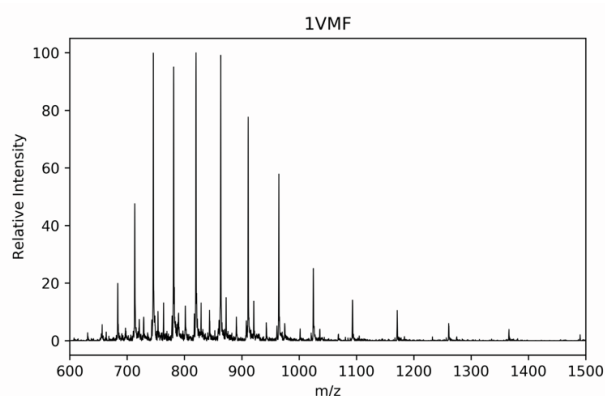

**b4** (1VMF, E66C & T132C)  
*MW* calc. = 16 381.5 Da  
 found = 16 383.6 Da

| Charge | m/z found<br>[M+H] <sup>+</sup> | m/z calc. |
|--------|---------------------------------|-----------|
| 24     | 683.8                           | 683.6     |
| 23     | 713.3                           | 713.2     |
| 22     | 745.7                           | 745.6     |
| 21     | 781.2                           | 781.1     |
| 20     | 820.2                           | 820.1     |
| 19     | 863.3                           | 863.2     |
| 18     | 911.2                           | 911.1     |
| 17     | 964.7                           | 964.6     |
| 16     | 1024.9                          | 1024.8    |
| 15     | 1093.2                          | 1093.1    |
| 14     | 1171.2                          | 1171.1    |
| 13     | 1261.0                          | 1261.1    |
| 12     | 1366.1                          | 1366.1    |

Un-reacted b4 peak list

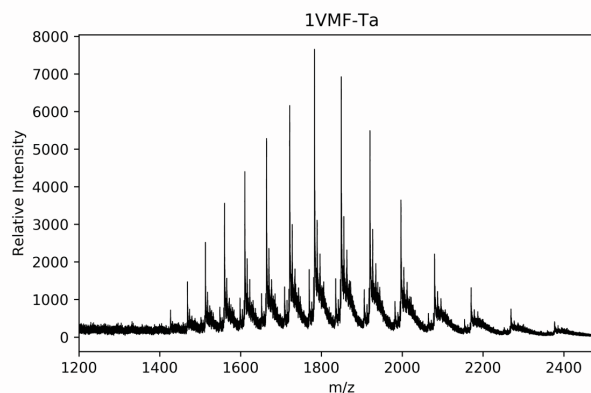

bicyclic **b4<sub>3</sub>Ta<sub>2</sub>**  
*MW* calc. = 49 901.1 Da  
 found. = 49 901.1 Da

| Charge | m/z found<br>[M+H] <sup>+</sup> | m/z calc. |
|--------|---------------------------------|-----------|
| 35     | 1426.85                         | 1426.75   |
| 34     | 1468.60                         | 1468.68   |
| 33     | 1513.13                         | 1513.15   |
| 32     | 1560.42                         | 1560.41   |
| 31     | 1610.69                         | 1610.71   |
| 30     | 1664.37                         | 1664.37   |
| 29     | 1721.72                         | 1721.73   |
| 28     | 1783.17                         | 1783.18   |
| 27     | 1849.18                         | 1849.19   |
| 26     | 1920.23                         | 1920.27   |
| 25     | 1996.96                         | 1997.04   |
| 24     | 2080.16                         | 2080.21   |
| 23     | 2170.60                         | 2170.61   |
| 22     | 2269.20                         | 2269.23   |
| 21     | 2377.25                         | 2377.24   |

b4<sub>3</sub>Ta<sub>2</sub> peak list (49 901.1 Da species)

**Figure S14. Mass spectra and peak lists for b4 (PDB ID: 1VMF, E66C & T132C) before (left) and after (right) crosslinking by two Ta-I<sub>3</sub> molecules, producing bicyclic b4<sub>3</sub>Ta<sub>2</sub> (Figure 5B).** The found mass corresponds to the molecular weight of three copies of the un-reacted protein variant (16 381.5 Da) plus two molecules of reacted Ta (381.37 Da), minus six hydrogens. An additional species with a mass difference of approximately +178 Da (*MW* = 16 561 Da) was observed for the un-reacted protein, corresponding to a common post-translational gluconylation of the protein N-terminus [6]. This mass increase becomes more prominent in the subsequent spectra of the covalently cross-linked trimer due to the probability of at least one gluconylated monomer forming part of a trimer (*MW* = 50 079 Da). Data collected on Agilent LC/MSD XT ESI-Quadrupole LC/MS (**b4**) and Agilent 6230 ESI-TOF LC/MS (**b4<sub>3</sub>Ta<sub>2</sub>**).

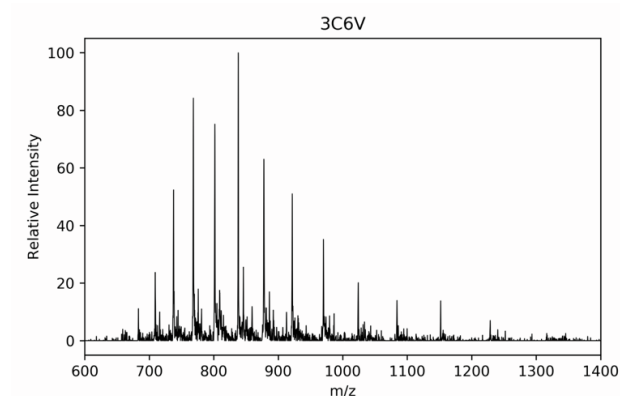

**a4** (3C6V, E45C & A70C)  
*MW* calc. = 18 411.8 Da  
 found = 18 413.7 Da

| Charge | m/z found<br>[M+H] <sup>+</sup> | m/z calc. |
|--------|---------------------------------|-----------|
| 27     | 683.3                           | 682.9     |
| 26     | 709.2                           | 709.1     |
| 25     | 737.7                           | 737.5     |
| 24     | 768.4                           | 768.2     |
| 23     | 801.7                           | 801.5     |
| 22     | 838.0                           | 837.9     |
| 21     | 877.7                           | 877.8     |
| 20     | 921.7                           | 921.6     |
| 19     | 970.0                           | 970.0     |
| 18     | 1024.1                          | 1023.9    |
| 17     | 1084.1                          | 1084.0    |
| 16     | 1151.9                          | 1151.7    |

Un-reacted a4 peak list

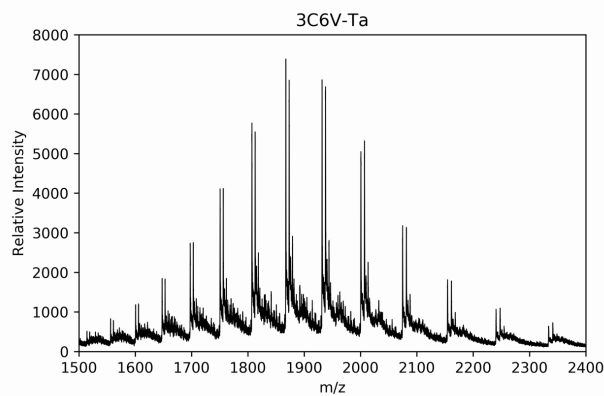

bicyclic **a4<sub>3</sub>Ta<sub>2</sub>**  
*MW* calc. = 55 992.1 Da  
 found. = 55 991.7 Da

| Charge | m/z found<br>[M+H] <sup>+</sup> | m/z calc. |
|--------|---------------------------------|-----------|
| 36     | 1556.28                         | 1556.34   |
| 35     | 1600.77                         | 1600.77   |
| 34     | 1647.85                         | 1647.83   |
| 33     | 1697.67                         | 1697.73   |
| 32     | 1750.76                         | 1750.75   |
| 31     | 1807.21                         | 1807.20   |
| 30     | 1867.41                         | 1867.40   |
| 29     | 1931.77                         | 1931.76   |
| 28     | 2000.74                         | 2000.72   |
| 27     | 2074.79                         | 2074.78   |
| 26     | 2154.55                         | 2154.54   |
| 25     | 2240.70                         | 2240.68   |
| 24     | 2333.98                         | 2334.00   |

a4<sub>3</sub>Ta<sub>2</sub> peak list (55 991.7 Da species)

**Figure S15. Mass spectra and peak lists for a4 (PDB ID: 3C6V, E45C & A70C) before (left) and after (right) crosslinking by two Ta-I<sub>3</sub> molecules, producing bicyclic a4<sub>3</sub>Ta<sub>2</sub> (Figure 5C).** The found mass corresponds to the molecular weight of three copies of the un-reacted protein variant (18 411.8 Da) plus two molecules of reacted Ta (381.37 Da), minus six hydrogens. An additional species with a mass difference of approximately +178 Da (*MW* = 18 592 Da) was observed for the un-reacted protein, corresponding to a common post-translational gluconylation of the protein N-terminus [6]. This mass increase becomes more prominent in the subsequent spectra of the covalently cross-linked trimer due to the probability of at least one gluconylated monomer forming part of a trimer (*MW* = 56 170). Data collected on Agilent LC/MSD XT ESI-Quadrupole LC/MS (**a4**) and Agilent 6230 ESI-TOF LC/MS (**a4<sub>3</sub>Ta<sub>2</sub>**).

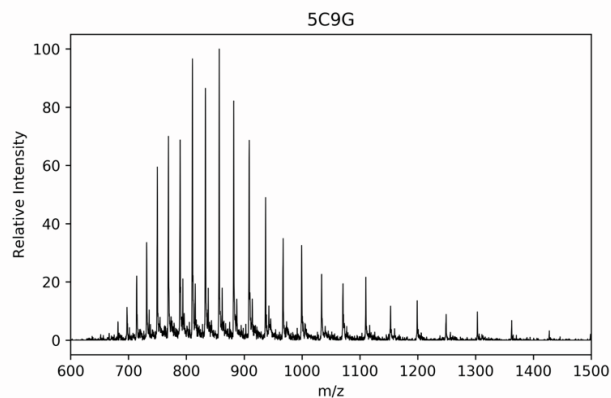

**e4** (5C9G, S176C & G221C)  
*MW* calc. = 29 951.1 Da  
 found = 29 952.9 Da

| Charge | m/z found<br>[M+H] <sup>+</sup> | m/z calc. |
|--------|---------------------------------|-----------|
| 41     | 731.4                           | 731.5     |
| 40     | 749.8                           | 749.8     |
| 39     | 769.1                           | 769.0     |
| 38     | 789.3                           | 789.2     |
| 37     | 810.6                           | 810.5     |
| 36     | 833.0                           | 833.0     |
| 35     | 856.9                           | 856.7     |
| 34     | 882.0                           | 881.9     |
| 33     | 908.8                           | 908.6     |
| 32     | 937.1                           | 937.0     |
| 31     | 967.4                           | 967.2     |
| 30     | 999.4                           | 999.4     |
| 29     | 1034.0                          | 1033.8    |
| 28     | 1079.9                          | 1070.7    |
| 27     | 1110.4                          | 1110.3    |
| 26     | 1153.2                          | 1153.0    |
| 25     | 1199.2                          | 1199.0    |
| 24     | 1249.2                          | 1249.0    |

Un-reacted e4 peak list

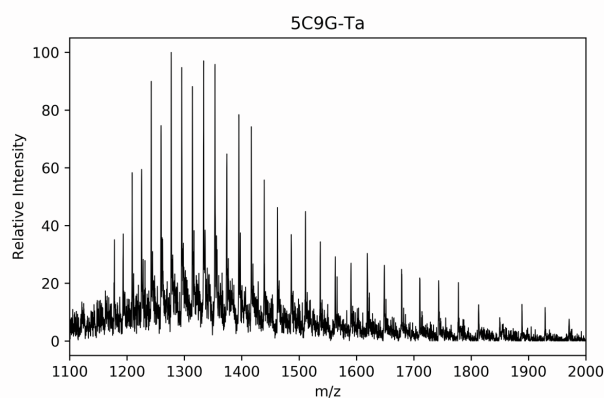

bicyclic **e4<sub>3</sub>Ta<sub>2</sub>**  
*MW* calc. = 90 610.1 Da  
 found. = 90 606.7 Da

| Charge | m/z found<br>[M+H] <sup>+</sup> | m/z calc. |
|--------|---------------------------------|-----------|
| 74     | 1225.4                          | 1225.5    |
| 73     | 1242.2                          | 1242.2    |
| 72     | 1259.3                          | 1259.5    |
| 71     | 1277.0                          | 1277.2    |
| 70     | 1295.4                          | 1295.4    |
| 69     | 1314.0                          | 1314.2    |
| 68     | 1333.7                          | 1333.5    |
| 67     | 1353.4                          | 1353.4    |
| 66     | 1374.1                          | 1373.9    |
| 65     | 1395.0                          | 1395.0    |
| 64     | 1416.7                          | 1416.8    |
| 63     | 1439.2                          | 1439.3    |
| 62     | 1462.3                          | 1462.5    |
| 61     | 1486.3                          | 1486.4    |
| 60     | 1511.2                          | 1511.2    |
| 59     | 1537.1                          | 1536.8    |
| 58     | 1563.2                          | 1563.2    |
| 57     | 1590.6                          | 1590.7    |

e4<sub>3</sub>Ta<sub>2</sub> peak list (90 606.7 Da species)

**Figure S16. Mass spectra and peak lists for e4 (PDB ID: 5C9G, S176C & G221C) before (left) and after (right) crosslinking by two Ta-I<sub>3</sub> molecules, producing bicyclic e4<sub>3</sub>Ta<sub>2</sub> (Figure 5D). The found mass corresponds to the molecular weight of three copies of the un-reacted protein variant (29 951.1 Da) plus two molecules of reacted Ta (381.37 Da), minus six hydrogens. Data collected on Agilent LC/MSD XT ESI-Quadrupole LC/MS.**

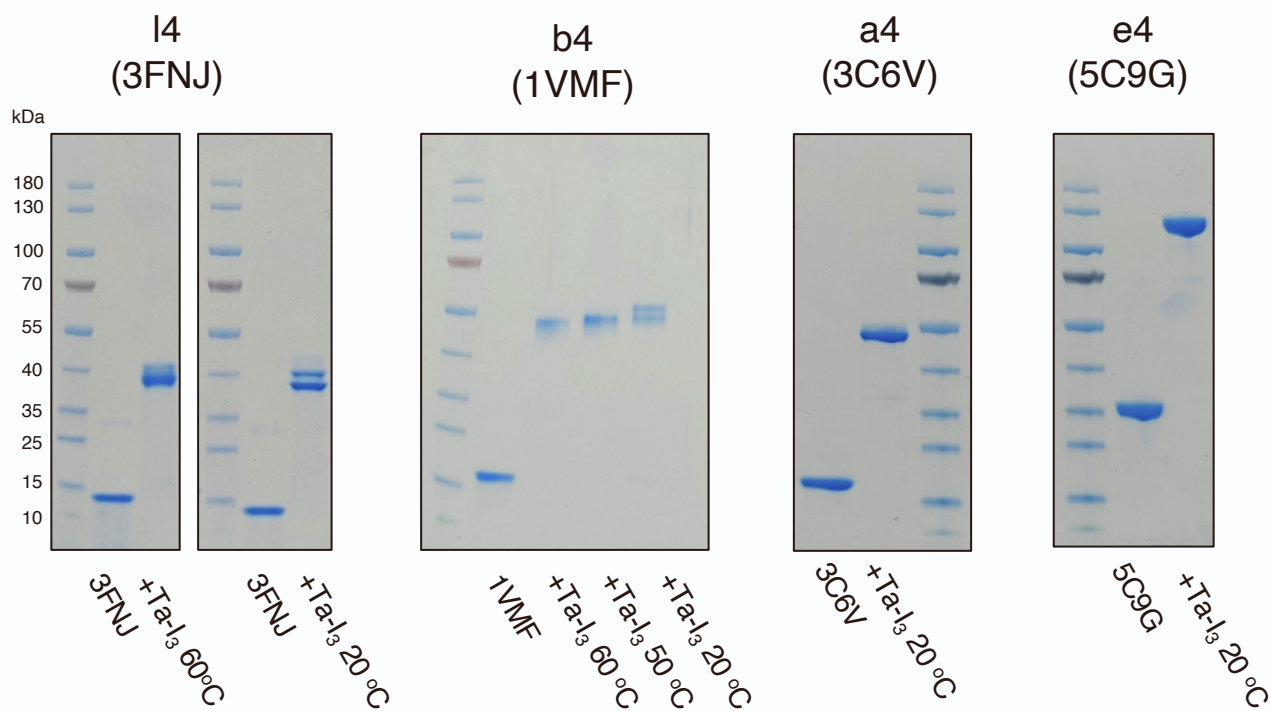

| Variant | Expected MW monomer / kDa | Expected MW trimer / kDa |
|---------|---------------------------|--------------------------|
| a4      | 18.4                      | 56.0                     |
| e4      | 30.0                      | 90.6                     |
| I4      | 14.2                      | 43.4                     |
| b4      | 16.4                      | 49.0                     |

**Figure S17. SDS-PAGE analysis of 2-hour reactions of Ta-l<sub>3</sub> with homotrimers shows formation of crosslinked species (relates to trimers presented in Figure 5).** All four proteins demonstrate formation of a covalent trimer. In analogy to the bicyclic PFE variant (**p4<sub>3</sub>Ta<sub>2</sub>**), we observed migration behaviour deviating from the linear protein ladder (higher apparent masses) due to the altered protein chain topology. The reactions for **I4** (3FNJ) and **b4** (1VMF) at room temperature show evidence of two closely related species, however increasing the reaction temperature resolves both to a predominant single product. The crosslinked SDS-PAGE **b4** sample was prepared by addition of 6 M urea in addition to loading dye, and not heated to 95°C, as the standard protocol failed to migrate through the gel.

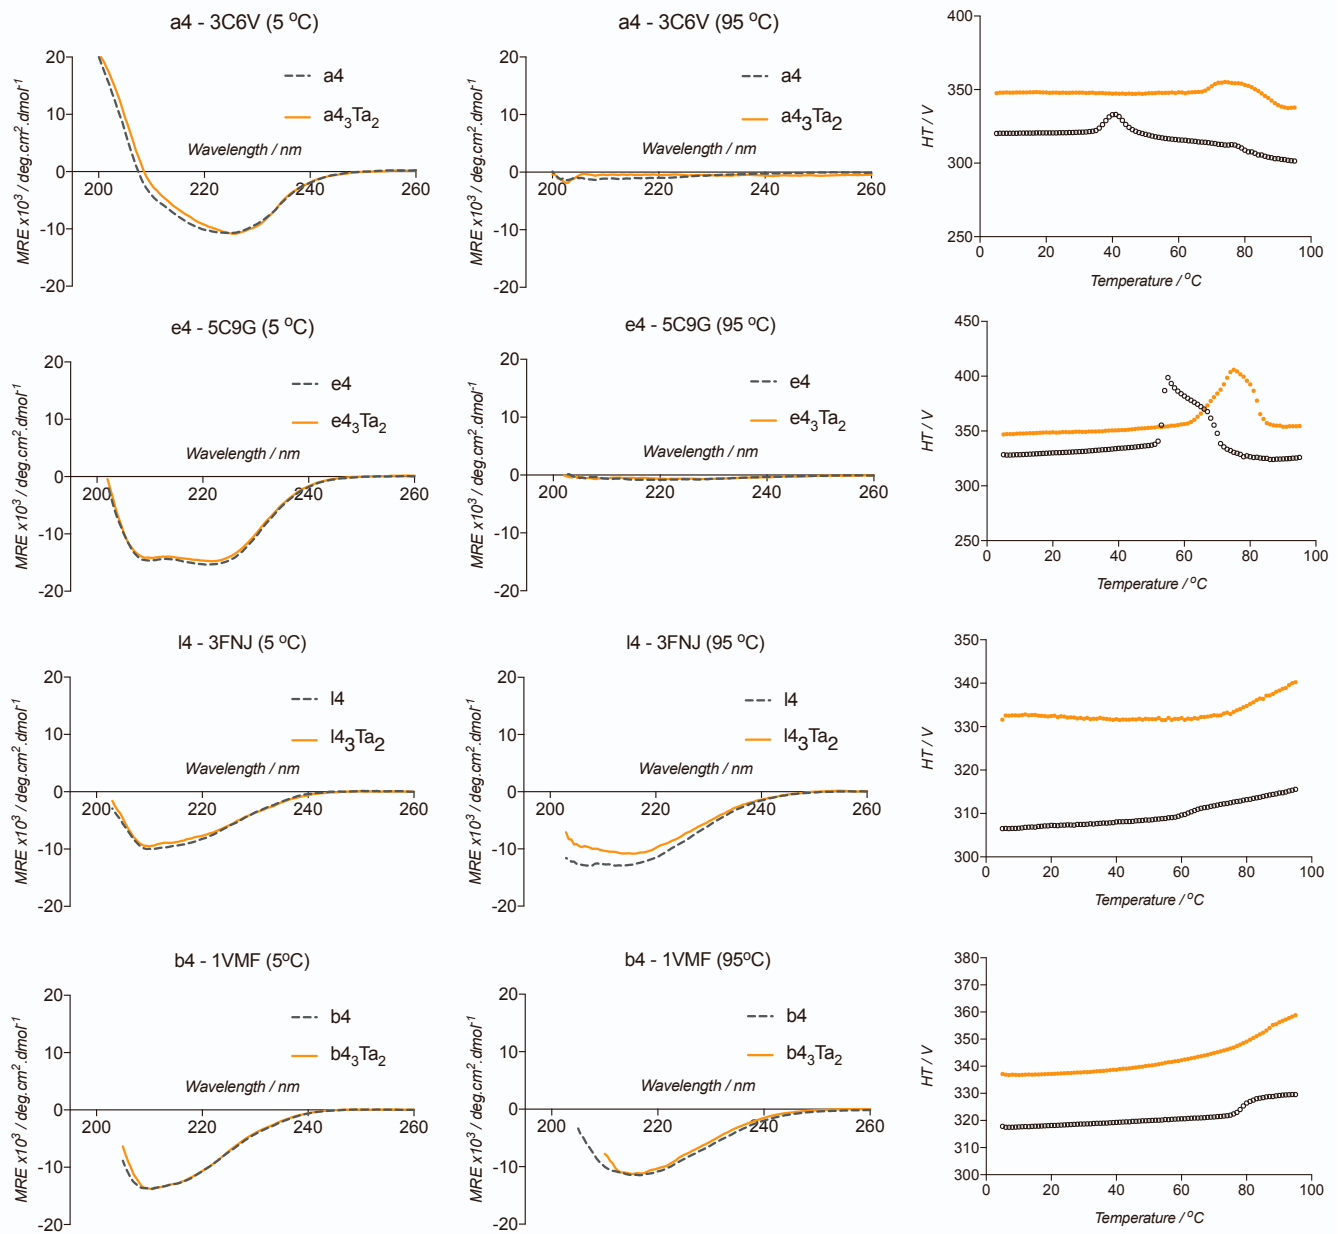

**Figure S18. Circular dichroism validates stabilization of bicyclic trimers (relating to data presented in Figure 5).** Circular dichroism spectra ( $\lambda = 200\text{--}260$  nm) of trimeric variants before (black, dash) and after (orange) crosslinking, at 5°C (left) and 95°C (middle). Right: High tension (HT) recordings for thermal denaturation measurements ( $\lambda = 220$ ).

## Supplementary Tables

**Table S1. High-resolution native MS of PFE trimers.** Includes **p1** and crosslinked trimer variants **p2<sub>3</sub>Ta**, **p3<sub>3</sub>Ta** and **p4<sub>3</sub>Ta<sub>2</sub>**. Data collected on TIMS-Qq-TOF mass spectrometer with an ESI source.

| Sample                  | Calculated mass trimer (MW / Da) | Found (m/z, with z = 20 <sup>+</sup> ) | Deconvoluted (MW / Da) | Mass accuracy (ppm) |
|-------------------------|----------------------------------|----------------------------------------|------------------------|---------------------|
| <b>p1</b>               | 92784.00                         | 4640.12                                | 92783.15               | -9 ppm              |
| <b>p2<sub>3</sub>Ta</b> | 93168.44                         | 4659.73                                | 93167.10               | -14 ppm             |
| <b>p3<sub>3</sub>Ta</b> | 93087.38                         | 4655.59                                | 93086.20               | -9.4 ppm            |
| <b>p4<sub>3</sub>Ta</b> | 93471.82                         | 4674.83                                | 93469.89               | -20 ppm             |

**Table S2. Peak list for MS charge state analysis of p2<sub>3</sub>Ta.** Most abundant charge state is Z = 91 (Figure 1C). Data collected on Agilent Technologies G6230A ESI-TOF LC/MS.

| Charge    | m/z found<br>[M+H] <sup>+</sup> | Relative<br>Abundance | Charge | m/z found<br>[M+H] <sup>+</sup> | Relative<br>Abundance |
|-----------|---------------------------------|-----------------------|--------|---------------------------------|-----------------------|
| 114       | 818.20                          | 0.029                 | 79     | 1180.27                         | 0.522                 |
| 113       | 825.42                          | 0.041                 | 78     | 1195.38                         | 0.492                 |
| 111       | 840.28                          | 0.053                 | 77     | 1210.89                         | 0.482                 |
| 110       | 847.90                          | 0.074                 | 76     | 1226.81                         | 0.483                 |
| 109       | 855.68                          | 0.096                 | 75     | 1243.15                         | 0.473                 |
| 108       | 863.59                          | 0.111                 | 74     | 1259.94                         | 0.488                 |
| 107       | 871.64                          | 0.139                 | 73     | 1277.19                         | 0.470                 |
| 106       | 879.86                          | 0.172                 | 72     | 1294.91                         | 0.469                 |
| 105       | 888.24                          | 0.209                 | 71     | 1313.14                         | 0.461                 |
| 104       | 896.76                          | 0.237                 | 70     | 1331.88                         | 0.445                 |
| 103       | 905.47                          | 0.292                 | 69     | 1351.17                         | 0.443                 |
| 102       | 914.33                          | 0.355                 | 68     | 1371.04                         | 0.421                 |
| 101       | 923.38                          | 0.417                 | 67     | 1391.47                         | 0.406                 |
| 100       | 932.60                          | 0.485                 | 66     | 1412.54                         | 0.402                 |
| 99        | 942.02                          | 0.578                 | 65     | 1434.26                         | 0.377                 |
| 98        | 951.62                          | 0.661                 | 64     | 1456.70                         | 0.352                 |
| 97        | 961.42                          | 0.758                 | 63     | 1479.76                         | 0.344                 |
| 96        | 971.43                          | 0.819                 | 62     | 1503.61                         | 0.310                 |
| 95        | 981.64                          | 0.893                 | 61     | 1528.25                         | 0.293                 |
| 94        | 992.07                          | 0.943                 | 60     | 1553.71                         | 0.268                 |
| 93        | 1002.74                         | 0.996                 | 59     | 1580.02                         | 0.253                 |
| 92        | 1013.62                         | 0.970                 | 58     | 1607.25                         | 0.233                 |
| <b>91</b> | <b>1024.75</b>                  | <b>1.000</b>          | 57     | 1635.42                         | 0.209                 |
| 90        | 1036.13                         | 0.961                 | 56     | 1664.61                         | 0.194                 |
| 89        | 1047.76                         | 0.951                 | 55     | 1694.85                         | 0.177                 |
| 88        | 1059.65                         | 0.873                 | 54     | 1726.22                         | 0.157                 |
| 87        | 1071.82                         | 0.831                 | 53     | 1758.77                         | 0.145                 |
| 86        | 1084.28                         | 0.794                 | 52     | 1792.58                         | 0.123                 |
| 85        | 1097.02                         | 0.724                 | 51     | 1827.71                         | 0.111                 |
| 84        | 1110.06                         | 0.680                 | 50     | 1864.25                         | 0.099                 |
| 83        | 1123.43                         | 0.631                 | 49     | 1902.27                         | 0.084                 |
| 82        | 1137.12                         | 0.600                 | 48     | 1941.88                         | 0.069                 |
| 81        | 1151.14                         | 0.558                 | 47     | 1983.17                         | 0.058                 |
| 80        | 1165.52                         | 0.525                 | 46     | 2026.28                         | 0.047                 |

**Table S3. Peak list for MS charge state analysis of p3<sub>3</sub>Ta.** Most abundant charge state is Z = 61 (Figure 1C). Data collected on Agilent Technologies G6230A ESI-TOF LC/MS.

| Charge    | m/z found<br>[M+H] <sup>+</sup> | Relative<br>Abundance | Charge | m/z found<br>[M+H] <sup>+</sup> | Relative<br>Abundance |
|-----------|---------------------------------|-----------------------|--------|---------------------------------|-----------------------|
| 85        | 1096.11                         | 0.008                 | 58     | 1605.81                         | 0.975                 |
| 84        | 1109.05                         | 0.006                 | 57     | 1633.96                         | 0.945                 |
| 83        | 1122.38                         | 0.009                 | 56     | 1663.12                         | 0.884                 |
| 82        | 1136.05                         | 0.019                 | 55     | 1693.34                         | 0.832                 |
| 81        | 1150.13                         | 0.016                 | 54     | 1724.68                         | 0.777                 |
| 80        | 1164.52                         | 0.020                 | 53     | 1757.20                         | 0.711                 |
| 79        | 1179.19                         | 0.031                 | 52     | 1790.98                         | 0.631                 |
| 78        | 1194.32                         | 0.042                 | 51     | 1826.07                         | 0.562                 |
| 77        | 1209.81                         | 0.053                 | 50     | 1862.57                         | 0.504                 |
| 76        | 1225.7                          | 0.074                 | 49     | 1900.57                         | 0.444                 |
| 75        | 1242.05                         | 0.093                 | 48     | 1940.14                         | 0.393                 |
| 74        | 1258.82                         | 0.119                 | 47     | 1981.40                         | 0.340                 |
| 73        | 1276.06                         | 0.152                 | 46     | 2024.46                         | 0.291                 |
| 72        | 1293.76                         | 0.200                 | 45     | 2069.42                         | 0.239                 |
| 71        | 1311.97                         | 0.248                 | 44     | 2116.43                         | 0.192                 |
| 70        | 1330.7                          | 0.312                 | 43     | 2165.63                         | 0.159                 |
| 69        | 1349.96                         | 0.389                 | 42     | 2217.16                         | 0.131                 |
| 68        | 1369.8                          | 0.469                 | 41     | 2271.22                         | 0.108                 |
| 67        | 1390.24                         | 0.575                 | 40     | 2327.97                         | 0.090                 |
| 66        | 1411.29                         | 0.692                 | 39     | 2387.64                         | 0.074                 |
| 65        | 1432.98                         | 0.769                 | 38     | 2450.44                         | 0.062                 |
| 64        | 1455.35                         | 0.868                 | 37     | 2516.64                         | 0.052                 |
| 63        | 1478.45                         | 0.932                 | 36     | 2586.52                         | 0.039                 |
| 62        | 1502.28                         | 0.970                 | 35     | 2660.40                         | 0.027                 |
| <b>61</b> | <b>1526.88</b>                  | <b>1.000</b>          | 34     | 2738.63                         | 0.018                 |
| 60        | 1552.32                         | 0.999                 | 33     | 2821.58                         | 0.011                 |
| 59        | 1578.61                         | 0.989                 | 32     | 2909.88                         | 0.006                 |



**Table S4. Peak list for MS charge state analysis of p4<sub>3</sub>Ta<sub>2</sub>.** Most abundant charge state is Z = 42 (Figure 1C). Data collected on Agilent Technologies G6230A ESI-TOF LC/MS.

| Charge | m/z found<br>[M+H] <sup>+</sup> | Relative<br>Abundance | Charge    | m/z found<br>[M+H] <sup>+</sup> | Relative<br>Abundance |
|--------|---------------------------------|-----------------------|-----------|---------------------------------|-----------------------|
| 66     | 1417.20                         | 0.023                 | 47        | 1989.50                         | 0.647                 |
| 63     | 1484.61                         | 0.035                 | 46        | 2032.74                         | 0.722                 |
| 62     | 1508.50                         | 0.042                 | 45        | 2077.88                         | 0.808                 |
| 61     | 1533.17                         | 0.058                 | 44        | 2125.09                         | 0.889                 |
| 60     | 1558.73                         | 0.064                 | 43        | 2174.48                         | 0.970                 |
| 59     | 1585.09                         | 0.080                 | <b>42</b> | <b>2226.23</b>                  | <b>1.000</b>          |
| 58     | 1612.39                         | 0.104                 | 41        | 2280.50                         | 0.980                 |
| 57     | 1640.67                         | 0.132                 | 40        | 2337.49                         | 0.888                 |
| 56     | 1669.95                         | 0.156                 | 39        | 2397.41                         | 0.757                 |
| 55     | 1700.28                         | 0.192                 | 38        | 2460.47                         | 0.621                 |
| 54     | 1731.75                         | 0.233                 | 37        | 2526.95                         | 0.485                 |
| 53     | 1764.39                         | 0.277                 | 36        | 2597.12                         | 0.381                 |
| 52     | 1798.31                         | 0.326                 | 35        | 2671.31                         | 0.295                 |
| 51     | 1833.55                         | 0.383                 | 34        | 2749.85                         | 0.246                 |
| 50     | 1870.20                         | 0.446                 | 33        | 2833.15                         | 0.204                 |
| 49     | 1908.34                         | 0.508                 | 32        | 2921.66                         | 0.170                 |
| 48     | 1948.08                         | 0.574                 |           |                                 |                       |

**Table S5. Peak lists for MS charge state analysis of un-reacted p2, p3 and p4.** Most abundant charge states are 37, 37 and 38 respectively. Data collected on Agilent Technologies G6230A ESI-TOF LC/MS.

| p2        |                              |                    | p3        |                              |                    | p4        |                              |                    |
|-----------|------------------------------|--------------------|-----------|------------------------------|--------------------|-----------|------------------------------|--------------------|
| Charge    | m/z found [M+H] <sup>+</sup> | Relative Abundance | Charge    | m/z found [M+H] <sup>+</sup> | Relative Abundance | Charge    | m/z found [M+H] <sup>+</sup> | Relative Abundance |
| 47        | 659.0                        | 1686               | 44        | 703.3                        | 310                | 45        | 687.8                        | 377                |
| 46        | 673.3                        | 3526               | 43        | 719.6                        | 549                | 44        | 703.4                        | 575                |
| 45        | 688.3                        | 7620               | 42        | 736.7                        | 1083               | 43        | 719.7                        | 1139               |
| 44        | 703.9                        | 16883              | 41        | 754.7                        | 1871               | 41        | 754.8                        | 2929               |
| 43        | 720.2                        | 34836              | 40        | 773.5                        | 2638               | 40        | 773.6                        | 5755               |
| 42        | 737.4                        | 73319              | 39        | 793.3                        | 3720               | 39        | 793.4                        | 8270               |
| 41        | 755.3                        | 139003             | 38        | 814.2                        | 4391               | <b>38</b> | <b>814.3</b>                 | <b>9580</b>        |
| 40        | 774.2                        | 208155             | <b>37</b> | <b>836.2</b>                 | <b>4919</b>        | 37        | 836.3                        | 9069               |
| 39        | 794.0                        | 276399             | 36        | 859.4                        | 4820               | 36        | 859.5                        | 9763               |
| 38        | 814.9                        | 319631             | 35        | 883.9                        | 4535               | 35        | 884.0                        | 9723               |
| <b>37</b> | <b>836.9</b>                 | <b>330838</b>      | 34        | 909.9                        | 4098               | 34        | 910.0                        | 9134               |
| 36        | 860.1                        | 314184             | 33        | 937.4                        | 3641               | 33        | 937.5                        | 8188               |
| 35        | 884.6                        | 283557             | 32        | 966.7                        | 3317               | 32        | 966.8                        | 7341               |
| 34        | 910.6                        | 253840             | 31        | 997.8                        | 3012               | 31        | 997.9                        | 5153               |
| 33        | 938.2                        | 222451             | 30        | 1031.0                       | 2446               | 30        | 1031.2                       | 5660               |
| 32        | 967.5                        | 194658             | 29        | 1066.6                       | 2211               | 29        | 1066.7                       | 4647               |
| 31        | 998.6                        | 169614             | 28        | 1104.6                       | 1756               | 28        | 1104.7                       | 3492               |
| 30        | 1031.9                       | 143373             | 27        | 1145.5                       | 1574               | 27        | 1145.6                       | 3667               |
| 29        | 1067.4                       | 122401             | 26        | 1189.5                       | 1419               | 26        | 1189.7                       | 2481               |
| 28        | 1105.5                       | 102762             | 25        | 1237.1                       | 1422               | 25        | 1237.2                       | 3149               |
| 27        | 1146.4                       | 90941              | 24        | 1288.6                       | 1401               | 24        | 1288.7                       | 2859               |
| 26        | 1190.5                       | 85006              | 23        | 1344.5                       | 1464               | 23        | 1344.7                       | 2881               |
| 25        | 1238.1                       | 81834              | 22        | 1405.6                       | 1365               | 22        | 1405.8                       | 2480               |
| 24        | 1289.6                       | 83511              | 21        | 1472.5                       | 1084               | 21        | 1472.6                       | 1993               |
| 23        | 1345.6                       | 85830              | 20        | 1546.1                       | 691                | 20        | 1546.2                       | 1217               |
| 22        | 1406.8                       | 80611              | 19        | 1627.4                       | 325                | 19        | 1627.6                       | 619                |
| 21        | 1473.7                       | 62805              |           |                              |                    | 18        | 1717.9                       | 314                |
| 20        | 1547.3                       | 37650              |           |                              |                    |           |                              |                    |
| 19        | 1628.7                       | 17555              |           |                              |                    |           |                              |                    |
| 18        | 1719.2                       | 8198               |           |                              |                    |           |                              |                    |
| 17        | 1820.2                       | 4385               |           |                              |                    |           |                              |                    |
| 16        | 1933.9                       | 2530               |           |                              |                    |           |                              |                    |

**Table S6. Thermal stabilization of crosslinked PFE variants.** Inflection melting temperatures ( $T_i$ ) for PFE variants **p1-p4** and their crosslinked variants. Values are an average of triplicate DSF measurements,  $T_i$  values are not reported where the dynamic range of the measurement is less than 30% of the corresponding native melt (melting curves presented in Figure 2B, 2C and Figure S5).

|                                     | Native $T_i$ / °C | Denaturing $T_i$ / °C |             |             |             |
|-------------------------------------|-------------------|-----------------------|-------------|-------------|-------------|
|                                     | 0.0 M GuHCl       | 0.5 M GuHCl           | 1.0 M GuHCl | 1.5 M GuHCl | 2.0 M GuHCl |
| <b>p1</b>                           | 79.6              | 62.0                  | 52.6        | -           | -           |
| <b>p2</b>                           | 79.7              | 62.3                  | 52.9        | -           | -           |
| <b>p3</b>                           | 76.9              | 59.3                  | -           | -           | -           |
| <b>p4</b>                           | 76.8              | 59.3                  | -           | -           | -           |
| <b>p2<sub>3</sub>Ta</b>             | 80.6              | 65.0                  | 54.6        | -           | -           |
| <b>p3<sub>3</sub>Ta</b>             | 84.3              | 67.7                  | 57.3        | 51.2        | -           |
| <b>p4<sub>3</sub>Ta<sub>2</sub></b> | 85.2              | 70.9                  | 61.6        | 53.0        | -           |

**Table S7. Denaturant resistant activity of crosslinked PFE variants (relates to Figure 2D).** Initial rates of *p*-NPA hydrolysis by PFE variants (errors account for  $1\sigma$ ). Initial rate values determined from curves presented in Figure 2E, 2F and Figure S6. The relative rates (relative to the initial **p4<sub>3</sub>Ta<sub>2</sub>** rate at each given GuHCl concentration) are presented in Figure 2D.

| Concentration of GuHCl / M | p1                                |                        | p2 <sub>3</sub> Ta                |                        | p3 <sub>3</sub> Ta                |                        | p4 <sub>3</sub> Ta <sub>2</sub>   |                        |
|----------------------------|-----------------------------------|------------------------|-----------------------------------|------------------------|-----------------------------------|------------------------|-----------------------------------|------------------------|
|                            | Initial rate / mM.s <sup>-1</sup> | Error                  |
| 0.0                        | 1.06·10 <sup>-3</sup>             | 0.16·10 <sup>-3</sup>  | 1.28·10 <sup>-3</sup>             | 0.14·10 <sup>-3</sup>  | 1.14·10 <sup>-3</sup>             | 0.17·10 <sup>-3</sup>  | 1.25·10 <sup>-3</sup>             | 0.13·10 <sup>-3</sup>  |
| 0.5                        | 5.57·10 <sup>-4</sup>             | 0.13·10 <sup>-4</sup>  | 5.48·10 <sup>-4</sup>             | 0.12·10 <sup>-4</sup>  | 6.27·10 <sup>-4</sup>             | 0.093·10 <sup>-4</sup> | 5.97·10 <sup>-4</sup>             | 0.15·10 <sup>-4</sup>  |
| 1.0                        | 2.78·10 <sup>-4</sup>             | 0.053·10 <sup>-4</sup> | 3.65·10 <sup>-4</sup>             | 0.088·10 <sup>-4</sup> | 3.38·10 <sup>-4</sup>             | 0.068·10 <sup>-4</sup> | 3.45·10 <sup>-4</sup>             | 0.19·10 <sup>-4</sup>  |
| 1.5                        | 7.08·10 <sup>-6</sup>             | 0.79·10 <sup>-6</sup>  | 9.89·10 <sup>-5</sup>             | 0.091·10 <sup>-5</sup> | 1.52·10 <sup>-4</sup>             | 0.027·10 <sup>-4</sup> | 2.03·10 <sup>-4</sup>             | 0.052·10 <sup>-4</sup> |
| 2.0                        | 5.74·10 <sup>-7</sup>             | 0.40·10 <sup>-7</sup>  | 1.36·10 <sup>-5</sup>             | 0.18·10 <sup>-5</sup>  | 5.36·10 <sup>-5</sup>             | 0.14·10 <sup>-5</sup>  | 7.52·10 <sup>-5</sup>             | 0.30·10 <sup>-5</sup>  |

**Table S8. Data collection and structural refinement statistics for bicyclic p4<sub>3</sub>Ta<sub>2</sub>.** Values in parentheses represent the highest resolution shell (2.50–2.60 Å). Crystal structure presented in Figure 4.

| <b>p4<sub>3</sub>Ta<sub>2</sub> (PDB ID = 8pi1)</b> |                           |
|-----------------------------------------------------|---------------------------|
| <b>Data Collection</b>                              |                           |
| Beamline                                            | Diamond Light Source, I04 |
| Space group                                         | C 1 2 1                   |
| Unit cell dimensions (Å): a, b, c                   | 254.80, 146.25, 154.59    |
| Unit cell angles (°): a, b, g                       | 90.00, 122.63, 90.00      |
| Resolution (Å)                                      | 2.50                      |
| Number of unique reflections                        | 164678                    |
| CC <sub>1/2</sub>                                   | 99.7 (52.1)               |
| I/σ                                                 | 8.88 (1.12)               |
| Completeness (%)                                    | 100.0 (99.9)              |
| <b>Refinement</b>                                   |                           |
| Resolution (Å)                                      | 2.50                      |
| No. unique reflections used in refinement           | 156444                    |
| R <sub>work</sub>                                   | 0.182                     |
| R <sub>free</sub>                                   | 0.224                     |
| No. protein atoms used in refinement                | 31 894                    |
| No. water molecules used in refinement              | 533                       |
| Average B-factors (Å <sup>2</sup> )                 | 45.25                     |
| R.M.S deviations – length (Å)                       | 0.010                     |
| R.M.S deviations – angle (°)                        | 1.320                     |
| Ramachandran favoured residues (%)                  | 97                        |
| Ramachandran outlying residues (%)                  | 0                         |

**Table S9. PDB ID codes of 119 proteins identified by search for non-redundant C3-symmetric protein trimers.** Each contains up to one cysteine residue and at least one tryptophan per monomer, as well as a hexa-histidine tag in their PDB sequence.

| No. | PDB  | Cys | No. | PDB_ID | Cys | No. | PDB   | Cys | No. | PDB  | Cys |
|-----|------|-----|-----|--------|-----|-----|-------|-----|-----|------|-----|
| 1   | 6T6J | 0   | 32  | 4UMI   | 0   | 63  | 2JCA  | 0   | 94  | 5WYN | 1   |
| 2   | 2CZ4 | 0   | 33  | 5BOH   | 0   | 64  | 3Z EZ | 1   | 95  | 4F3J | 1   |
| 3   | 3FNJ | 0   | 34  | 4PXK   | 0   | 65  | 7MS0  | 1   | 96  | 4UAH | 1   |
| 4   | 3LME | 0   | 35  | 5KKH   | 0   | 66  | 4OZJ  | 1   | 97  | 6YZY | 1   |
| 5   | 3H5I | 0   | 36  | 4XXJ   | 0   | 67  | 4E9X  | 1   | 98  | 4EX8 | 1   |
| 6   | 2WDY | 0   | 37  | 6XT4   | 0   | 68  | 3T9W  | 1   | 99  | 3ZE3 | 1   |
| 7   | 3MXU | 0   | 38  | 4UC0   | 0   | 69  | 5TB7  | 1   | 100 | 6YSP | 1   |
| 8   | 4D0V | 0   | 39  | 3E35   | 0   | 70  | 4XI0  | 1   | 101 | 4LHR | 1   |
| 9   | 3I7T | 0   | 40  | 2ETV   | 0   | 71  | 7RFO  | 1   | 102 | 4OUS | 1   |
| 10  | 4JCU | 0   | 41  | 2WAM   | 0   | 72  | 4XC5  | 1   | 103 | 4OUL | 1   |
| 11  | 3Q8U | 0   | 42  | 6EUS   | 0   | 73  | 4NJN  | 1   | 104 | 1VMH | 1   |
| 12  | 3C6V | 0   | 43  | 5KA6   | 0   | 74  | 6PSP  | 1   | 105 | 4M1A | 1   |
| 13  | 5B8F | 0   | 44  | 3K9A   | 0   | 75  | 5C9G  | 1   | 106 | 3OFV | 1   |
| 14  | 5XUB | 0   | 45  | 5APZ   | 0   | 76  | 3GVF  | 1   | 107 | 3B8L | 1   |
| 15  | 6B7C | 0   | 46  | 2IBL   | 0   | 77  | 5WUF  | 1   | 108 | 2RDM | 1   |
| 16  | 4GCY | 0   | 47  | 5ZHY   | 0   | 78  | 2NT8  | 1   | 109 | 4DI1 | 1   |
| 17  | 3EJV | 0   | 48  | 5LNL   | 0   | 79  | 4LK5  | 1   | 110 | 4NSN | 1   |
| 18  | 3ZF1 | 0   | 49  | 4Y2L   | 0   | 80  | 3H0U  | 1   | 111 | 5N2C | 1   |
| 19  | 1VIY | 0   | 50  | 3LYB   | 0   | 81  | 2WST  | 1   | 112 | 4HZ5 | 1   |
| 20  | 7DSZ | 0   | 51  | 2YO2   | 0   | 82  | 2DCH  | 1   | 113 | 3AM2 | 1   |
| 21  | 5WUC | 0   | 52  | 3BK6   | 0   | 83  | 3GTZ  | 1   | 114 | 3ZJB | 1   |
| 22  | 1PG6 | 0   | 53  | 3WPP   | 0   | 84  | 1VPH  | 1   | 115 | 3K12 | 1   |
| 23  | 4G9Q | 0   | 54  | 3QV0   | 0   | 85  | 4XEL  | 1   | 116 | 4L8P | 1   |
| 24  | 6ZLO | 0   | 55  | 3LX2   | 0   | 86  | 1VMF  | 1   | 117 | 7E4G | 1   |
| 25  | 3GKB | 0   | 56  | 2XQH   | 0   | 87  | 2YKP  | 1   | 118 | 2B2H | 1   |
| 26  | 2PBZ | 0   | 57  | 6H21   | 0   | 88  | 2YKO  | 1   | 119 | 5KVB | 1   |
| 27  | 5O68 | 0   | 58  | 2C3F   | 0   | 89  | 1KR4  | 1   |     |      |     |
| 28  | 1LR0 | 0   | 59  | 4USX   | 0   | 90  | 1VHF  | 1   |     |      |     |
| 29  | 4LKB | 0   | 60  | 5HRZ   | 0   | 91  | 3RPX  | 1   |     |      |     |
| 30  | 4EC6 | 0   | 61  | 4LGO   | 0   | 92  | 4LEH  | 1   |     |      |     |
| 31  | 2F1V | 0   | 62  | 5WTR   | 0   | 93  | 4L8O  | 1   |     |      |     |

**Table S10. Bicyclization via Ta-I<sub>3</sub> was attempted for 14 unique CATH domains, of which variants for 13 domains were successfully expressed and purified.** Eight domains demonstrated significant thermal stabilization after addition of the crosslinker, while bicyclization was confirmed for four examples (\*) by mass spectrometry (Figures S13–S16). \*\*Indicates  $T_m$  values (equilibrium midpoint) obtained by circular dichroism measurements (Figure 5), all other values indicate  $T_i$  (inflection temperature) obtained by DSF measurements (Figures S10 and S11). Sequences are provided in (Table S11).

| No. | CATH Domain  | Domain name                                    | PDB ID (variant) | Crosslinking Sites       | Variant $T_i$ / °C | Crosslinked $T_i$ / °C | $\Delta T_i$ / °C |
|-----|--------------|------------------------------------------------|------------------|--------------------------|--------------------|------------------------|-------------------|
| 1   | 3.30.429.10  | Macrophage Migration Inhibitory Factor         | 3C6V* (a4)       | <i>E45C &amp; A70C</i>   | 41                 | 80                     | 39**              |
|     |              |                                                | 7MS0             | <i>R10C &amp; E107C</i>  | 75                 | >90                    | >15               |
| 2   | 3.90.226.10  | 2-enoyl-CoA Hydratase                          | 5C9G* (e4)       | <i>S176C &amp; G221C</i> | 54                 | 71                     | 17**              |
|     |              |                                                | 4LK5             | <i>A185C &amp; E231C</i> | 69                 | >90                    | >21               |
| 3   | 3.40.250.10  | Rhodanese-like domain                          | 3FNJ* (l4)       | <i>E7C &amp; E108C</i>   | 61                 | 80                     | 19**              |
| 4   | 2.60.120.460 | YjbQ-like, Jelly Rolls, Sandwich               | 1VMF* (b4)       | <i>E66C &amp; T132C</i>  | 77                 | 83                     | 6**               |
| 5   | 2.60.90.10   | Adenovirus pIV-related, attachment domain      | 2WST             | <i>V117C &amp; V245C</i> | 64                 | 77                     | 13                |
| 6   | 3.30.70.120  | Alpha-Beta Plaits                              | 1KR4             | <i>E34C &amp; E86C</i>   | 64                 | 76                     | 12                |
|     |              |                                                | 4OZJ             | <i>N43C &amp; E108C</i>  | ambiguous          | ambiguous              | -                 |
| 7   | 3.10.450.50  | Nuclear Transport Factor 2                     | 3EJV             | <i>A4C &amp; V126C</i>   | 46, 80             | 51, 88                 | 5-8               |
| 8   | 3.30.1330.40 | RutC-like                                      | 3GTZ             | <i>N20C &amp; Q96C</i>   | 90                 | >95                    | > 5               |
|     |              |                                                | 3LME             | <i>D53C &amp; Q136C</i>  | 68                 | 70                     | 2                 |
| 9   | 2.40.50.100  | RNA polymers II, barrel-sandwich hybrid domain | 3MXU             | <i>D9C &amp; A115C</i>   | 59                 | 63                     | 4                 |
| 10  | 2.30.42.10   | PDZ domain                                     | 5WYN             | <i>Q146C &amp; A327C</i> | 76                 | 78                     | 2                 |
| 11  | 3.40.50.300  | P-loop containing NTP hydrolases               | 1VIY             | <i>E79C &amp; A167C</i>  | ambiguous          | ambiguous              | 0                 |
| 12  | 3.90.470.20  | 4'-phosphopantetheinyl transferase domain      | 2JCA             | <i>S2C &amp; E12C</i>    | 80                 | 80                     | 0                 |
| 13  | 2.60.40.420  | Cupredoxins - blue copper proteins             | 4E9X             | <i>M195&amp;D254</i>     | >90°C              | >90°C                  | 0                 |
| 14  | 2.70.40.10   | Deoxyuridine triphosphatase (dUTPase)          | 3ZEZ             | <i>Y57C &amp; K100C</i>  | No expression      | -                      | -                 |

**Table S11. Full-length sequences of the expanded suite of C3-symmetric trimer variants designed for bicyclization, including purification tags.** All proteins were expressed in a pET28a (+) vector.

**3FNJ\_INCYPRO (14)**

MANDKKICLLTTYLSLYIDHHTVLADMQNATGKYVVLVDVRNAPAQVKKDQIKGAIAMPAKDLATRIGELDKPAKTYVV  
YDWTGGTTLGKTALLVLLSAGFEAYELAGALCGWKGMLPVETLADLEHHHHHH

**3LME\_INCYPRO**

MASLKI IAPTDKTITPSGTWSIGARAGCFVFIGGMHGTDRVTGKMVDGDEARIRRMFDNMLAAAEAAAGATKADAVRL  
TVFVTDVAKYRPVVNKVQKDIWGDGPYPRTVLCVPALDQGDIAEIDGTFYAPAEGHHHHHH

**2JCA\_INCYPRO**

MGSSHHHHHSSGLVPRGSHMCIIGVGIDVACVERFGAALERTPALAGRLFLESELLPGGERRGVASLAARFAAKE  
ALAKALGAPAGLLWTDAAEVVVEAGGRPRLRVTGTVAARAAELGVASWHVSLSHDAGIASAVVIAEG

**3MXU\_INCYPRO**

MAHHHHHHMGTLEAQTQGGPMSKTYFTQCHEWLSVEGQVVTVGITDYAQEQLGDLVFI DL PQNGTKLSKGDAAAVV  
ESVKAASDVYAPLDGEVVEINAALAESPELVNQKAETEGWLWKMTVQDETQLERLLDECAYKELIG

**3C6V\_INCYPRO (a4)**

MGSSHHHHHSSGRENLYFQGMPRWLIQHSPNTLTPEEKSHLAQQITQAYVGFGLPAFYVQVHFICQPAGTSFIGGE  
QHPNFVALTIYHLCRTMSTDEQRQGF LKRIDAFLTPMFEPKIDWEYFVTEAPRDLWKINGLAPPAAGSEEEKVWVR  
ENRPVRF

**3EJV\_INCYPRO**

MGSDKIHHHHHENLYFQGMTMCDETIILNVLGQYTRAHRRDPDAMAALFAPEATIEIVDAVGGASRSISRLEGRD  
AIRVAVRQMMAPHGYRAWSONVVNAPIIVIEGDHAVLDAQFMVFSILAAEVPDGGWPTGTFGAQGRICPIEAGQYRL  
TLRTVADGWVISAMRIEHLRPMAFG

**3ZEZ\_INCYPRO**

MGSSHHHHHSSGLVPRGSHMASMTGGQQMGRGSMTNTLQVKLLSKNARMPERNHKT DAGYDIFSAETVVLEPQEKA  
VIKTDVAVSIPEGCVGLLTSRSGVSSKTHLVIETGKIDAGYHGNLGINIKNDHEDDCMQTIFLRNIDNEKIFEKERH  
LYKLSYRIEKGERIAQLVIVPIWTPPELKVVEEFESV SERGEKGFSSGV

**1VIY\_INCYPRO**

MASLRYIVALTTGGIGSGKSTVANAFADLGINVIDADI IARQVVEPGAPALHAIADHFGANMIAADGTLQRRALRERI  
FANPCEKNWLNALLHPLIQOETQHQIQQATSPYVLVWVPLLVENS LYKKANRVLVVDVSPETQLKRTMQRDDVTREH  
VEQILAAQATREARLCVADDVIDNNGAPDAIASDVARLHAHYLQLASQFVSQEKPEGGSHHHHHH

**7MS0\_INCYPRO**

MAPTYTCWSQCIRISREAKQRIAEAITDAHHEL AHAPKYLQVIFNEVEPDSYFIAAQSA SENHIWVQATIRSGRTE  
KQKEELLRLTQEIALILGIPNEEVVYITCIPGSNMTEYGRLLMEPGEEKWFNSLPEGLRERL TELEGSSEENLY  
FQGLEHHHHHH

**4OZJ\_INCYPRO**

MGSSHHHHHSSGLVPAGSHMSDADLPNDGGIKLVMAIIRPKLADVKTALAEV GAPSLTVTCVSGRGSQP AKKSQW  
RGEETYVDLHQVKVKECVVADTPAEDVADAIADAAHTGEKGDGKIFILPVCNAIQVRTGKTGRDAV

**4E9X\_INCYPRO**

MAERFDMTIEEVTIKVAPGLDYKVF GFNGQVPGPLIHVQEGDDVI VNVNTNNTSLPHTIHHHG VHQKGTWRS DGVPG  
VTQQPIEAGDSYTYKFKADRIGTLWYHCHVNVNEHVGVGMWGPLIVDPKQPLPIEKRVTKDVIMMSTWESAVADK  
YEGGGTPCNVADYFSVNAKSFPLTQPLRVKKG DVVKIRFFGAGGGIHAMHSHGHDMLVTHKDGLPLCSPYYADTVLV  
SPGERYDVIIEADNPGRFIFHDHVDTHVTAGGKHPGGPITVIEYDGVVDDWYVWKDKDYDPNFFYSES LKQGYGMF  
DHDGFKGEFEQRQRRPGRKLAAALEHHHHHH

**5C9G\_INCYPRO (e4)**

MGHHHHHSSGVDLGTENLYFQSM TLP IRLDIAAPLAEIVLNKPERRNALSVDMMWAAIPGLVAEANANPDVKLILIH  
GGDAGAF AAGADISEFETIYATEDAAKASGQRI AQALDAIENSEKPVIAAIEGACVGGGVSLAMAADLRVAGEGAKF  
GVT PGKGLGVYPAGDTRRLLAAVPGATKDILFTGRIFTAGEAKCLGLIDRLVEKGTALEAARVWAGEIAAISQWSV  
RATKRMIRGLQTCWTDETPEAQSLFLNGFANEDFKEGYRAFLDKRPAKFTYR



**4LK5\_INCYPRO**

MGHHHHHHSSGVDLGTENLYFQSMPSAIATLAPVAGLDVTLSDGVFSVTINRPDSLNSLTPVITGIADAMEYAAT  
DPEVKVVRIGGAGRGFSSGAGISADDVSDGGGVPPDEIILEINRLVRAIAALPHPVVAVVQGAAGVGVSIACDV  
VLASENAFFMLAFTKIGLMPDGGASALVAAVGRIRAMQALLPERLPAAEALCWGLVTAVYPADEFEAQVVKVIAR  
LLSGPAVAFKTKLAINAATLTCLDPALQREFDQSVLLKSPDFVEGATAFQQRTPNFTR

**2WST\_INCYPRO**

MGSSHHHHHSSGLVPRGSHMASMTGGQQGRILCYPTLWTGPAPPEANVTFSGENSPSGILRLCLSRGTGGTVIGTSLV  
QGSLTNPSTGQTLGMNLYFDADGNVLESENLRVRSWGMKDQDTLVTPPIANGQYLMPLNTAYPRLIQTLTSSYIYTQA  
HLDHNNSCVDIKIGLNTDLRPTAAYGLSFTMTFTNSPPTSFGTDLVQFGYLGQD

**3GTZ\_INCYPRO**

MASLSIVRIDAEDRWSDVVIYNCTLWYTGVPENLDADAFEQTANTLAQIDAVLEKQSSKSRILDATIFLSDKADFA  
AMNKAWDAWVAGHAPVRCTVCAGLMNPKYKVEIKIVAAVEGHHHHHH

**1VMF\_INCYPRO (b4)**

MGSDKIHHHHHMKTFLHTTQSRDEMVDITSQIETWIRETGVTNGVAIVSSLHTTAGITVNNADPDVKRDMIMRLD  
CVYPWHHENDRHMEGNTAAHLKTSTVGHAQTLIISEGRLVLGTWQGVYFCEFDGPRTRNKFFVVKLLCD

**1KR4\_INCYPRO**

MGSSHHHHHSSGREALYFMGHMILVYSTFPNEEKALEIGRKLLEKRLIACFNAFICIRSGYWWKGEIVQDKEWAAIF  
KTTEEKEKELYEELRKLHPYETPAIFTLKVCNILTEYMNWLRESVLGS

**5WYN\_INCYPRO**

MAVPSPPPASPRSCYNFIADVVEKTAPAVVYIEILDRHPFLGREVPI SNGSGFVVAADGLIVTNAHVVADRRRVVR  
LLSGDYEAVVTAVDPVADIATLRIQTKPLPLGRSADVRQGEFVAMGSPFALQNTITSGIVSSAQRPARDLG  
LPQTNVEYIQTDAADFGNSGGPLVNL DGEVIGVNTMKVTCGISFAIPSDRLREFLHRGEKKNSSSGISGSQRRYIG  
VMMLTSLPSILAELQLREPSFPDVQHGVLIHKVILGSPAHRAGLRPGDVILAI GEQMVQNAEDVWEAVRTQSQLAVQ  
IRRGRETTLTYVTPEVTEHHHHHH

**Table S12. Enhanced thermal stability of bicyclic trimer designs.** Circular dichroism derived  $T_m$  values for trimer designs before and after bicyclization, presented in Figure 5.

| Protein          | $T_m / ^\circ\text{C}$ |          |                               |
|------------------|------------------------|----------|-------------------------------|
|                  | Unreacted              | Bicyclic | $\Delta T_m / ^\circ\text{C}$ |
| <b>l4</b> (3FNJ) | 61                     | 80       | 19                            |
| <b>b4</b> (1VMF) | 77                     | 83       | 6                             |
| <b>a4</b> (3C6V) | 41                     | 80       | 39                            |
| <b>e4</b> (5C9G) | 54                     | 71       | 17                            |

## Supplementary References

- [1] Drienovská, I., Gajdoš, M., Kindler, A., Takhtehchian, M., Darnhofer, B., Birner-Gruenberger, R., Dörr, M., Bornscheuer, U.T., and Kourist, R. (2020). Folding Assessment of Incorporation of Noncanonical Amino Acids Facilitates Expansion of Functional-Group Diversity for Enzyme Engineering. *Chemistry - A European Journal* 26, 12338–12342. 10.1002/chem.202002077.
- [2] Fürst, M.J.L.J., Martin, C., Lončar, N., and Fraaije, M.W. (2018). Experimental Protocols for Generating Focused Mutant Libraries and Screening for Thermostable Proteins. *Methods Enzymol* 608, 151–187. 10.1016/BS.MIE.2018.04.007.
- [3] Wilkins, M.R., Gasteiger, E., Bairoch, A., Sanchez, J.C., Williams, K.L., Appel, R.D., and Hochstrasser, D.F. (1999). Protein identification and analysis tools in the ExPASy server. *Methods Mol Biol* 112, 531–552. 10.1385/1-59259-584-7:531.
- [4] Depraz Depland, A., Stroganova, I., Wootton, C.A., and Rijs, A.M. (2023). Developments in Trapped Ion Mobility Mass Spectrometry to Probe the Early Stages of Peptide Aggregation. *J Am Soc Mass Spectrom* 34, 193–204. 10.1021/jasms.2c00253.
- [5] Frottin, F., Martinez, A., Peynot, P., Mitra, S., Holz, R.C., Giglione, C., and Meinnel, T. (2006). The proteomics of N-terminal methionine cleavage. *Molecular and Cellular Proteomics* 5, 2336–2349. 10.1074/mcp.M600225-MCP200.
- [6] Geoghegan, K.F., Dixon, H.B.F., Rosner, P.J., Hoth, L.R., Lanzetti, A.J., Borzilleri, K.A., Marr, E.S., Pezzullo, L.H., Martin, L.B., Lemotte, P.K., et al. (1999). Spontaneous  $\alpha$ -N-6-phosphogluconoylation of a “His tag” in *Escherichia coli*: The cause of extra mass of 258 or 178 Da in fusion proteins. *Anal Biochem* 267, 169–184. 10.1006/abio.1998.2990.
